**Title:**

**Temporal transcriptional response of *Candida glabrata* during macrophage infection reveals a multifaceted transcriptional regulator CgXbp1 important for macrophage response and drug resistance.**

Maruti Nandan Rai<sup>1</sup>, Chirag Parsania<sup>1</sup>, Rikky Rai<sup>1</sup>, Niranjana Shirgaonkar<sup>1</sup>, Kaeling Tan<sup>1,2</sup>,  
and Koon Ho Wong<sup>1,3,4\*</sup>

<sup>1</sup>Faculty of health sciences, University of Macau, Avenida da Universidade, Taipa, Macau SAR, China.

<sup>2</sup>Gene Expression, Genomics and Bioinformatics core, Faculty of Health Sciences, University of Macau, Avenida da Universidade, Taipa, Macau SAR of China.

<sup>3</sup>Institute of Translational Medicine, Faculty of Health Sciences, University of Macau, Avenida da Universidade, Taipa, Macau SAR of China.

<sup>4</sup>MoE Frontiers Science Center for Precision Oncology, University of Macau.

Maruti Nandan Rai - [mnrai@illinois.edu](mailto:mnrai@illinois.edu)

Chirag Parsania - [yb57653@connect.um.edu.mo](mailto:yb57653@connect.um.edu.mo)

Rikky Rai – [rrail@ufl.edu](mailto:rrail@ufl.edu)

Niranjana Shirgaonkar - [niranjana.shirgaonkar@gmail.com](mailto:niranjana.shirgaonkar@gmail.com)

Kaeling Tan - [kaelingt@um.edu.mo](mailto:kaelingt@um.edu.mo)

Koon Ho Wong - [koonhowong@um.edu.mo](mailto:koonhowong@um.edu.mo)

\*For correspondence, please contact [koonhowong@um.edu.mo](mailto:koonhowong@um.edu.mo).

1 **Abstract**

2 *Candida glabrata* can thrive inside macrophages and tolerate high levels of azole antifungals.  
3 These innate abilities render infections by this human pathogen a clinical challenge. How *C.*  
4 *glabrata* reacts inside macrophages and what is the molecular basis of its drug tolerance are  
5 not well understood. Here, we mapped genome-wide RNA polymerase II (RNAPII)  
6 occupancy in *C. glabrata* to delineate its transcriptional responses during macrophage  
7 infection in high temporal resolution. RNAPII profiles revealed dynamic *C. glabrata*  
8 responses to macrophage with genes of specialized pathways activated chronologically at  
9 different times of infection. We identified an uncharacterized transcription factor (CgXbp1)  
10 important for the chronological macrophage response, survival in macrophages, and  
11 virulence. Genome-wide mapping of CgXbp1 direct targets further revealed its multi-faceted  
12 functions, regulating not only virulence-related genes but also genes associated with drug  
13 resistance. Finally, we showed that CgXbp1 indeed also affects azole resistance. Overall, this  
14 work presents a powerful approach for examining host-pathogen interaction and uncovers a  
15 novel transcription factor important for *C. glabrata*'s survival in macrophages and drug  
16 tolerance.  
17

## 18 **Introduction**

19           Phagocytes such as macrophages constitute the first line of host immune defence  
20 against invading pathogens (Brown, 2011; Erwig and Gow, 2016). The ability to escape or  
21 survive phagocytic attacks is fundamental to the virulence of pathogens (Seider *et al*, 2010;  
22 Erwig & Gow, 2016). *Candida* species are prominent opportunistic fungal pathogens with an  
23 associated mortality rate of ~29-60% among immunocompromised population (Bongomin *et*  
24 *al.*, 2017; Lamothe *et al.*, 2018). *Candida albicans* is responsible for most Candidiasis  
25 infections, although recent studies indicate an epidemiological shift in Candidiasis with an  
26 upsurge in infections caused by *Candida glabrata* (Benedict *et al*, 2017; Lamothe *et al*, 2018).  
27 Relative to other fungal species including *C. albicans*, *C. glabrata* is more resistant to  
28 antifungal drugs like fluconazole and can survive and proliferate inside immune cells (Seider  
29 *et al.*, 2011; Rai *et al.*, 2012). Thus far, details about how *C. glabrata* survives, adapts and  
30 proliferates in phagocytes and the basis for its intrinsically high azole resistance are still not  
31 clearly understood.

32           Genome-wide transcriptomic studies have been performed to map the response of  
33 *Candida species* during macrophage infection (Lorenz & Fink, 2001; Rubin-Bejerano *et al*,  
34 2003; Lorenz *et al*, 2004; Kaur *et al*, 2007; Rai *et al*, 2012), but the insights gained into the  
35 infection process so far lack temporal resolution, centring mostly on the late stages of the  
36 pathogen-host interactions. We reason that the immediate and early pathogen response is  
37 pivotal for survival and adaptation in the host, while responses during later stages reflect  
38 strategies for growth and proliferation. Therefore, delineating the whole episode of pathogen  
39 response, instead of just a snapshot, during infection is fundamental to understanding  
40 pathogenesis. However, conventional transcriptomic analysis involving mRNAs are not  
41 suitable for dissecting dynamic temporal transcriptional changes, as measurements of mRNA  
42 levels are convoluted by transcript stabilities (Tan and Wong, 2019).

43 Here, we applied the powerful Chromatin Immuno-precipitation followed by Next  
44 Generation Sequencing (ChIP-seq) method against elongating RNA Polymerase II (RNAPII)  
45 to map *C. glabrata* transcriptional responses during macrophage infection. We show that *C.*  
46 *glabrata* responds to macrophage infection by mounting chronological transcriptional  
47 responses. Based on the expression pattern, we identified many candidate transcriptional  
48 regulators including a novel transcription factor, CgXbp1, for the macrophage response.  
49 Deletion of CgXbp1 led to accelerated transcriptional activation of genes associated with  
50 multiple biological processes during interaction with macrophages. We further demonstrate  
51 that CgXbp1 is a multifaceted transcription factor directly binding to ~10% of *C. glabrata*  
52 genes including many involves in the pathogenesis process and drug resistance. *CgXBPI*  
53 deletion resulted in attenuated survival in host macrophages, diminished virulence in the  
54 *Galleria mellonella* model of Candidiasis, and elevated resistance to antifungal drug  
55 fluconazole. Overall, our work uncovers an important novel transcription factor for *C.*  
56 *glabrata*'s survival in macrophages and antifungal drug resistance.

57

## 58 **Results**

### 59 **Mapping high temporal resolution transcriptional responses of *C. glabrata* during** 60 **macrophage infection**

61 To understand how *C. glabrata* survives macrophage phagocytosis, we applied ChIP-  
62 seq against elongating RNAPII in a time-course experiment after 0.5, 2, 4, 6, and 8 h of THP-  
63 1 macrophage infection to map genome-wide transcription responses of *C. glabrata* during  
64 different stages of THP-1 macrophage infection (Figure 1A). As expected, genes known to be  
65 induced by macrophage phagocytosis (e.g. tricarboxylic acid [TCA] cycle, glyoxylate bypass,  
66 and iron homeostasis genes (Kaur *et al*, 2007; Rai *et al*, 2012)) had significant RNAPII  
67 occupancies at their gene bodies specifically but not at inter-genic regions (Figure 1B, Figure

68 1-figure supplement 1A). In addition, the ChIP-seq data also revealed temporal gene  
69 expression information. For example, the ATP synthesis gene *CgCYC1* was dramatically up-  
70 regulated immediately (0.5 h) upon macrophage internalisation, while the TCA cycle gene  
71 *CgCIT2* and glyoxylate bypass gene *CgICL1* were induced slightly later at 2 h and their  
72 transcription levels decreased subsequently (4-6 h) (Figure 1B). In contrast, an opposite  
73 transcription pattern (e.g. gradual increasing and peaking at later stages) was observed for  
74 *CgFTR1*, *CgTRR1*, and *CgMT-I*, which are involved in iron uptake, biofilm formation, and  
75 sequestration of metal ions, respectively (Figure 1B). Therefore, the RNAPII ChIP-seq  
76 approach can effectively capture a high temporal resolution gene expression landscape in *C.*  
77 *glabrata* during macrophage infection.

78

### 79 ***C. glabrata* mounts dynamic, temporal and chronological transcription responses** 80 **during macrophage infection**

81 Systematic analysis of actively transcribed genes revealed that approximately 30% of  
82 *C. glabrata* genes (n = 1,589, Supplementary File 1) were constitutively transcribed (n = 511,  
83 Figure 1-figure supplement 1B) or temporally induced (n = 1,078, Figure 1-figure  
84 supplement 1C) during macrophage infection. Temporally induced genes were further  
85 classified into six groups according to their transcription pattern using *k*-means clustering.  
86 The overall transcriptional response was highly diverse with each group exhibiting a unique  
87 temporal transcriptional pattern (Figure 1C). Interestingly, while some genes were induced  
88 immediately (0.5 h, Group 1, n = 181) upon internalisation by macrophages, transcriptional  
89 induction of over 80% of genes (Group 2-6, n = 897) did not happen until later (2-8 h).  
90 Besides, their expression patterns were highly variable, illustrating the complex and dynamic  
91 nature of *C. glabrata* transcriptional response during macrophage infection.

92 Gene Ontology (GO) analysis revealed chronological activation of different biological  
93 processes during the infection process (Figure 1D, Supplementary File 2). In the immediate  
94 response (0.5 h), genes (Group 1, n = 181) were significantly enriched in processes such as  
95 adhesion, responses to copper ion and nitrogen compound, positive regulation of nuclear  
96 export in response to glucose starvation, lipid oxidation, and ATP synthesis (Figure 1D). This  
97 indicated that *C. glabrata* experiences nutrient and energy deprivation immediately upon  
98 entry to macrophages (Figure 1E). Alternatively, the induction of ATP biosynthesis genes  
99 may reflect a strong demand for energy by *C. glabrata* to deal with the host's attacks and/or  
100 to adapt to the host microenvironment. Subsequently (2 h post phagocytosis), *C. glabrata*  
101 underwent a major metabolic remodelling presumably to prepare for growth and generate  
102 energy, as reflected by the next wave of transcriptional induction for genes (Group 2, n =  
103 171) involved in the TCA cycle, biosynthesis of inosine 5' monophosphate (IMP), carboxylic  
104 acid, amino acid, nucleotide, and precursor for metabolite and energy (Figures 1C&D). In  
105 addition, cell cycle arrest and DNA damage checkpoint genes (*CgMEC3*, *CgGLC7*,  
106 *CAGL0G07271g*, and *CAGL0A04213g*) were also strongly induced at this early stage, and *C.*  
107 *glabrata* cells were indeed arrested at the G1-S phase cell cycle after macrophage engulfment  
108 (Figure 1-figure supplement 2). It is noteworthy that many genes and pathways previously  
109 shown to be critical for *C. glabrata* virulence (Kaur *et al.*, 2005; Rai *et al.*, 2012; Kasper *et*  
110 *al.*, 2015) such as adherence, response to DNA damage, oxidative stress, autophagy, TCA  
111 cycle, amino acid biosynthesis, and iron homeostasis (Figure 1-figure supplement 3A-G),  
112 were markedly induced at the early stages (0.5 and 2 h). Therefore, virulence-centric  
113 biological processes were among the most immediate *C. glabrata* responses upon  
114 macrophage phagocytosis (Figure 1E), implying the importance of the early transcriptional  
115 response towards its adaptation and survival in macrophages.

116           During the next stage of infection (2-4 h), *C. glabrata* continued to actively transcribe  
117 genes associated with carbon metabolism, DNA repair and pathogenesis (Group 3, Figures  
118 1C&D), suggesting that the invading pathogen was still trying to achieve metabolic  
119 homeostasis and to counter macrophage internal milieu. Genes required for chromatin  
120 assembly and modification were also significantly induced at this stage (Figure 1-figure  
121 supplement 4A&B), supporting an earlier report about the involvement of chromatin  
122 remodelling during the infection process (Rai *et al.*, 2012). Towards the later phase of this  
123 stage (4 h), genes for responses to different stresses (e.g. oxidative, chemical stress, and  
124 osmolarity) and resistance thermo-tolerance and oxidative stress (e.g. trehalose biosynthesis  
125 and pentose phosphate pathway, respectively) become maximally induced (Group 4, Figures  
126 1C&D). The induction of these stress response pathway genes towards the end of metabolic  
127 remodelling is somewhat unexpected, as it suggests that phagocytic attacks (e.g. ROS)  
128 against *C. glabrata* might not have occurred until the later phase. However, as shown above,  
129 the observations that DNA repair and damage response genes were already upregulated at 2 h  
130 indicate that cells had already experienced the attacks. These findings collectively suggest  
131 that *C. glabrata* elicits a coordinated stage-wise response during infection; first adapting to  
132 macrophage nutrient microenvironment before overcoming phagocytic attacks (Figure 1E).  
133 Interestingly, a family of sterol uptake genes (known as *TIR* [Tip1-related]) displayed  
134 concerted transcription activation at the end of this stage (4 h) (Figure 1-figure supplement  
135 5). In *Saccharomyces cerevisiae*, *TIR* genes are activated and required for growth under  
136 anaerobic condition (Abramova *et al.*, 2001). Given that sterols are an essential component of  
137 the cell membrane and that ergosterol biosynthesis is an oxygen-dependent process (Joffrion  
138 and Cushion, 2010), the up-regulation of the *TIR* genes indicates an experience of oxygen  
139 deprivation and a need for sterols (presumably for proliferation) by *C. glabrata*.

140 Towards the late stage (6-8 h), genes required for biofilm formation, iron  
141 homeostasis, both of which play critical roles in the pathogenesis process (Seider *et al*, 2014;  
142 Rodrigues *et al*, 2017), became maximal induced (Group 5, Figures 1C&D). As biofilm  
143 formation involves cell growth and proliferation, this observation potentially suggests that the  
144 cells are preparing for growth, and this is consistent with the concomitant induction of the  
145 iron homeostasis genes that are also necessary for proliferation. Altogether, the overall results  
146 revealed details into the dynamic stage-wise responses of *C. glabrata* during macrophage  
147 infection (Figure 1E).

148

#### 149 **Identification of potential transcriptional regulators of early temporal response**

150 We next attempted to identify the potential transcriptional regulators for the  
151 chronological transcriptional response. Remarkably, more than 25% of *C. glabrata*  
152 transcription factor (TF) genes (n = 53) were expressed during macrophage infection (Table  
153 1), with 39 TF genes showing a temporal induction pattern (Figure 2A). Of note, eleven TFs  
154 (Aft1, Ap1, Ap5, Haa1, Hap4, Hap5, Msn4, Upc2, Yap3, Yap6 and Yap7) are known to  
155 either bind or control some of the macrophage infection-induced genes (Supplementary File  
156 3) as reported by PathoYeasttract (Monteiro *et al*, 2020), providing strong support to the  
157 identified TFs being responsible for the observed temporal transcriptional response.

158 As the early response is likely to have influential effects on infection outcome, we  
159 focused on the four candidate TFs in Group 1 (induction at 0.5 h); the genes *CAGL0F00561g*,  
160 *CAGL0G02739g*, *CAGL0L03157g* and *CAGL0J04400g* are uncharacterized and annotated as  
161 the *Saccharomyces cerevisiae* orthologue of *RPA12*, *XBPI*, *DAL80*, and *HAP3*, respectively.  
162 Interestingly, three of the yeast orthologues (*RPA12*, *XBPI*, *DAL80*) have negative roles in  
163 transcription (Mai & Breeden, 1997; Marzluf, 1997; Yadav *et al*, 2016). Transcription  
164 regulatory network analysis by PathoYeasttract (Monteiro *et al.*, 2020) further showed that the



165 orthologues of ~35% macrophage infection-induced genes (n = 375 out of 1,078,  
166 respectively; Figure 2-figure supplement 1A, Supplementary File 4) are targets of Xbp1 in *S.*  
167 *cerevisiae* including a significant number of TF genes (n = 14; Figure 2-figure supplement  
168 1B). In contrast, a much smaller set of orthologous genes (~ 7%, n = 72, Figure 2-figure  
169 supplement 1A) is annotated as being *S. cerevisiae* Hap3 targets, while no information was  
170 available on the PathoYeast database (Monteiro *et al.*, 2020) for the other two repressors.  
171 These results suggest that the chronological transcriptional response upon macrophage  
172 phagocytosis involves the interplays between transcriptional repressors and activators and  
173 that the protein encoded by *CAGL0G02739g* (hereafter referred to as *CgXBPI*) likely plays a  
174 central role in orchestrating the overall response.

175

## 176 **CgXbp1 is crucial for the chronological transcriptional response during macrophage** 177 **infection**

178 We next deleted the *CgXBPI* gene and analysed the transcriptional response of the  
179 *Cgxbp1Δ* mutant to macrophages. RNAPII ChIP-seq time course analysis showed that a  
180 similar number of genes were transcribed in the mutant during macrophage infection (1,471  
181 versus 1,589 genes in *Cgxbp1Δ* and wildtype, respectively) (Supplementary File 5) and ~90%  
182 of the transcribed genes are common between wildtype and the mutant (Figure 2-figure  
183 supplement 1C), suggesting that CgXbp1 has little effect on the overall set of genes  
184 transcribed during macrophage infection. Notably, the *Cgxbp1Δ* mutant had a significantly  
185 higher number of genes activated at the earliest infection time point (0.5 h, Figure 2B,  
186 Supplementary File 5) as compared to wildtype (Figure 1C); e.g., 369 genes showed  
187 accelerated expression in the *Cgxbp1Δ* mutant, while 162 and 109 genes had an unchanged or  
188 delayed gene expression profile (Figure 2C).

189 Systematic GO analysis revealed multiple biological processes enriched among the  
190 genes with precocious activation in the *Cgxbp1Δ* mutant (0-0.5 h). They include processes  
191 like energy generation, chromatin assembly, cellular respiration and metabolism pathways  
192 such as TCA cycle, acetate catabolism, and amino acid, carboxylic acid, nucleotide and  
193 trehalose biosynthesis (Figure 3-figure supplement 1, Supplementary File 6). On the other  
194 hand, cell adhesion, host response and biofilm formation genes, which were up-regulated in  
195 wildtype cells during the late infection stage did not happen in the *Cgxbp1Δ* mutant within  
196 the 8 h infection duration examined (Figure 3-figure supplement 1).

197 Given that remodelling of carbon and nitrogen metabolism is crucial for the survival  
198 of fungal pathogens inside phagocytic cells (Lorenz and Fink, 2001; Rubin-Bejerano *et al.*,  
199 2003; Rai *et al.*, 2012; Seider *et al.*, 2014), we closely examined the expression patterns of  
200 TCA cycle and amino acid biosynthesis genes in wildtype and the *Cgxbp1Δ* mutant during  
201 macrophage infection. In wildtype cells, most genes of these two metabolic pathways were  
202 temporally induced with the maximal induction at 2h (Figures 3A&B). By contrast, the  
203 induction of these genes was advanced to 0.5 h (Figures 3A&B) and their overall expression  
204 levels were significantly higher (1.5 to 14.6 folds) in the mutant compared to wildtype,  
205 suggesting that CgXbp1 negatively regulates their expression (i.e., acting as a repressor) upon  
206 macrophage infection. Overall, the above results demonstrate that CgXbp1 is critical for the  
207 chronological transcriptional response of *C. glabrata* during macrophage infection.

208

209 **Loss of *CgXBPI* diminishes *C. glabrata* proliferation in human macrophages and**  
210 **attenuates virulence in the *Galleria mellonella* model of candidiasis**

211 To examine if the altered transcriptional response in the *Cgxbp1Δ* mutant affects the  
212 survival of *C. glabrata* cells in macrophages, we compared the ability of wildtype and the  
213 *Cgxbp1Δ* mutant to survive in THP-1 macrophages. PMA-differentiated THP-1 macrophages

214 were infected by wildtype and *Cgxbp1*Δ cells, and colony forming unit (CFU) assay was  
215 performed to determine the number of viable phagocytosed *C. glabrata* cells at 2, 8, and 24  
216 hours post macrophage infection. No significant difference in CFUs between wildtype and  
217 *Cgxbp1*Δ cells was observed at 2 h (Figure 4-figure supplement 1), suggesting similar  
218 phagocytosis efficiency of THP-1 macrophages for the two strains. At 8 and 24 h post-  
219 infection, wildtype cells exhibited ~ 1.6 and 5.1-fold increase in CFUs compared to that at  
220 2h. Although the *Cgxbp1*Δ mutant was able to proliferate inside macrophages, it displayed  
221 significantly lower CFUs (~20%) at both time points (1.3 and 3.9-fold) (Figure 4A). The  
222 reductions were rescued in the *Cgxbp1-pXBP1* complemented strain (Figure 4A). These  
223 results indicate that CgXbp1 is important for *C. glabrata* proliferation within macrophages.

224 We next examined the virulence of the wildtype and *Cgxbp1*Δ strains using the  
225 *Galleria mellonella* model of *Candida* infection (Jacobsen, 2014). We infected *G. mellonella*  
226 larvae with the wildtype, *Cgxbp1*Δ, and complemented strains, and monitored the morbidity  
227 and mortality of infected larvae over seven days. Although worms injected with wildtype or  
228 *Cgxbp1*Δ *C. glabrata* cells (but not phosphate buffered saline [PBS]) turned dark grey within  
229 4-6 h of infection due to melanin formation, which is a moth response to *C. glabrata*  
230 infection, and eventually died (Figure 4B), larvae injected with *Cgxbp1*Δ cells have a  
231 consistently slower mortality rate by ~20-30% compared to larvae infected by wildtype cells,  
232 suggesting that the loss of Xbp1 function attenuated the virulence (Figure 4B). The  
233 attenuated virulence was rescued in the complemented strain (Figure 4B). Therefore, CgXbp1  
234 is important for the survival of *C. glabrata* in human macrophages and virulence in the *in*  
235 *vivo* infection model.

236

237 **CgXbp1 targets the hierarchy of gene regulatory networks of diverse biological**  
238 **processes**

239           The importance of CgXbp1 towards *C. glabrata*'s response during macrophage and *in*  
240 *vivo* infection models prompted us to characterize its direct genome-wide roles in more  
241 details. We attempted ChIP-seq analysis against CgXbp1<sup>MYC</sup> during macrophage infection  
242 but failed to obtain consistent high-quality binding profiles from biological repeats (Pearson  
243 correlation  $r = 0.63$ ), presumably due to dynamic responses of *C. glabrata* within the ever-  
244 changing macrophage microenvironment during macrophage infection. We, therefore, turned  
245 to a defined laboratory condition for the characterization. In *S. cerevisiae*, Xbp1 (ScXbp1)  
246 encodes a global transcription repressor that regulates 15% of genes during quiescence (Mai  
247 and Breeden, 1997; Miles *et al.*, 2013). Pairwise amino acid sequence alignment showed  
248 reasonable conservation between ScXbp1 and CgXbp1, especially at the DNA binding  
249 domain and a few small scattered regions (Figure 5-figure supplement 1). Western blot  
250 analysis demonstrated that CgXbp1<sup>MYC</sup> protein expression was significantly induced during  
251 macrophage infection (Figure 5A) as well as after 3 and 4 days of growth during which cells  
252 have already entered the stationary phase (Figure 5B). The sequence conservation and  
253 expression pattern indicate that CgXbp1 also plays roles during quiescence in addition to  
254 macrophage response.

255           Next, we set out to identify CgXbp1<sup>MYC</sup> genome-wide targets using ChIP-seq during  
256 the quiescence phase (day 4 culture). Unlike the attempt for macrophage infection, ChIP-seq  
257 against CgXbp1<sup>MYC</sup> during quiescence produced highly correlated biological replicates  
258 (Pearson correlation  $r = 0.95$ ) (Figure 5-figure supplement 2A&B). Distinct CgXbp1<sup>MYC</sup>  
259 bindings were observed throughout the genome, while the input DNA control exhibited only  
260 background signals (Figures 5C&D). MACS2 analysis (Zhang *et al.*, 2008; Feng *et al.*, 2012)  
261 identified 519 CgXbp1<sup>MYC</sup> binding sites with 420 located at the promoter (i.e., within 2 kb  
262 upstream of the translation start site) of 384 annotated genes (Figure 5E, Supplementary Files  
263 7&8). Two over-represented DNA binding motifs (STVCN<sub>7</sub>TCT [where S represents G or C,

264 V represents T or C] and TCGAG) were identified by *de novo* motif discovery using MEME  
265 suite (Bailey *et al.*, 2009) (Figure 5F). While the TCGAG motif is similar to the consensus  
266 recognition sequence of *S. cerevisiae* Xbp1 ([TCGA], Mai & Breeden, 1997), the  
267 STVCN<sub>7</sub>TCT sequence appears to be composed of two halves with the second half showing  
268 some resemblance to the DNA binding motif of *S. cerevisiae* Azf1 (Figure 5-figure  
269 supplement 3A&B). Interestingly, the two motifs have different occurrence among the target  
270 promoters bound by CgXbp1<sup>MYC</sup> with the STVCN<sub>7</sub>TCT motif occurring approximately three  
271 times more frequent than the TCGAG sequence (e.g., n = 233 versus n = 82, respectively)  
272 (Figure 5F, Supplementary File 9).

273 The direct functions of CgXbp1 were determined using GO analysis and were  
274 significantly associated with major biological processes important for host infection such as  
275 “transport”, “response to stress”, “carbon and nitrogen metabolism”, and “biofilm formation”  
276 (Table 2, Supplementary File 10). These functions are consistent with the above findings that  
277 CgXbp1 is important for *C. glabrata* response and survival in macrophages. More  
278 importantly, CgXbp1<sup>MYC</sup> bindings were found at ~10% of transcription regulators (n = 57 out  
279 of 623 genes annotated as transcription regulators), including eight regulators of various  
280 stresses (e.g., oxidative stress, osmotic stress, nutrient, pH, acetate, chemical and salts) and  
281 ten TF genes involved in carbon catabolite regulation (Figure 5G, Supplementary File 11)  
282 Therefore, CgXbp1 exerts its controls over key biological processes through regulating the  
283 hierarchy of gene regulatory networks.

284

### 285 **CgXbp1 is a negative regulator of fluconazole resistance**

286 Several CgXbp1<sup>MYC</sup> bound genes (*CgPDH1*, *CgPDR13*, *CgQDR2*, *CgAQRI* and  
287 *CgTPO1*; Figure 6A, Supplementary File 10) are important for *C. glabrata* drug resistance  
288 (Hallstrom *et al.*, 1998; Miyazaki *et al.*, 1998; Costa *et al.*, 2016, 2013; Pais *et al.*, 2016).

289 Therefore, we examined whether CgXbp1 affects the resistance of *C. glabrata* to the  
290 antifungal fluconazole. Serial dilution spotting assay on solid media showed that *Cgxbp1* $\Delta$   
291 mutant had higher resistance to fluconazole compared to wildtype (Figure 6B), and the  
292 resistance was restored to the wildtype level in the complemented strain (Figure 6B).  
293 Importantly, the altered resistance is not due to an intrinsic difference in growth rate between  
294 the two strains, as demonstrated by their indistinguishable growth rates in the absence of drug  
295 in liquid media (Figure 6C). However, in presence of fluconazole (64  $\mu$ g/mL), the *Cgxbp1* $\Delta$   
296 mutant was able to grow faster and to a higher density than wildtype (Figure 6C). It is  
297 interesting to note that a biphasic growth curve was observed for both strains in the presence  
298 of fluconazole, suggesting the existence of two populations of cells (sensitive versus  
299 resistant). Consistently, we also noted from the spotting assay relatively more resistant  
300 colonies in the *Cgxbp1* $\Delta$  mutant as compared to wildtype. To confirm this, we performed a  
301 CFU assay by plating an equal number of exponentially growing wildtype, *Cgxbp1* $\Delta$  mutant  
302 and complemented cells on YPD medium with or without fluconazole (64  $\mu$ g/mL). The  
303 *Cgxbp1* $\Delta$  mutant displayed ~8-fold higher CFUs on fluconazole compared to that of wildtype  
304 and the complemented strain (Figure 6D), demonstrating the loss of CgXbp1 function led to a  
305 larger population of resistant cells. In conclusion, these results demonstrate that CgXbp1 is a  
306 negative regulator of fluconazole resistance in *C. glabrata*.

307

## 308 **Discussion**

309 *C. glabrata* is well known for its abilities to withstand azole antifungal drugs and to  
310 survive and grow inside phagocytic immune cells (Kaur *et al.*, 2005; Rai *et al.*, 2012).  
311 Through mapping genome-wide RNAPII occupancy, this work delineates the temporal  
312 transcriptional response of *C. glabrata* upon entry into macrophages, offering insights into  
313 the events occurring at different stages of macrophage infection. Our result reveals that ~30%

314 of *C. glabrata* genes are transcribed during the adaptation, survival and growth inside the  
315 alien macrophage microenvironments. At the most immediate response (0-0.5 h), *C. glabrata*  
316 activates adherence related genes to initiates adhesion to host surfaces. Concurrently, *C.*  
317 *glabrata* elicits specific responses to the nutrient-limiting microenvironment inside  
318 macrophages. This immediate response was followed by *C. glabrata* efforts to deal with  
319 oxidative and DNA-damage stresses (0-2 h), and at this time the phagocytosed *C. glabrata*  
320 cells were arrested at the G1-S phase of the cell cycle (Figure 1-figure supplement 2B).  
321 Subsequently (2-4 h), *C. glabrata* undergoes transcriptional remodeling to adjust its carbon  
322 metabolism, presumably to generate energy for future challenges, growth and/or  
323 proliferation. Consistently, processes necessary for growth such as global transcription,  
324 ribosome biogenesis and copper and iron ion homeostasis were activated around this time (2-  
325 6 h). These transcriptional activities indicate that *C. glabrata* are well-adapted to the  
326 macrophage microenvironment at this stage of infection. Lastly (8 h), *C. glabrata* induced  
327 genes associated with cell proliferation and biofilm formation, implying that they have  
328 overcome macrophage attacks and are ready to grow and divide.

329         It is noteworthy that despite sensing starvation within the first 0.5 h upon macrophage  
330 engulfment, *C. glabrata* does not activate alternate carbon catabolic pathways until 2 h. In  
331 addition, gene expression and translation-related genes show the lowest transcription levels  
332 (i.e., RNAPII occupancy) at this immediate stage (0.5 h) relative to the other time points  
333 (Group 6 genes in Figures 1C&D), indicating global suppression of gene expression in *C.*  
334 *glabrata* upon macrophage phagocytosis. A recent study showed that the fungal pathogen  
335 *Cryptococcus neoformans* also down-regulate translation during exposure to oxidative stress  
336 and suggested that translation suppression may facilitate the degradation of irrelevant  
337 transcripts during stress to facilitate proper gene expression and survival (Leipheimer *et al.*,  
338 2019). A similar strategy may be employed by *C. glabrata* in response to the stresses

339 experienced upon macrophage phagocytosis. Another non-mutually exclusive possibility is  
340 that the suppression of gene expression helps *C. glabrata* to reserve energy and resources for  
341 coping with the hostile, nutrient-limiting macrophage environment.

342         Transcriptional responses are determined by the overall TFs activities in a cell. The  
343 RNAPII profiles revealed a panel of 53 TF genes expressed during macrophage infection. In  
344 particular, 39 of them were temporally induced and are promising candidate regulators for the  
345 stage-specific transcription responses. Of note, several uncharacterized TFs (CgXbp1,  
346 CgDal80 and CgRpa12) were strongly activated at the earliest infection stage. In *S.*  
347 *cerevisiae*, the orthologues of these TFs play negative regulatory roles (i.e., transcriptional  
348 repressors (Mai and Breeden, 1997; Marzluf, 1997; Yadav *et al.*, 2016)), suggesting the  
349 importance of transcriptional repression in shaping the overall transcriptional response to  
350 macrophages (Figure 7). This was confirmed by the precocious transcriptional activation of a  
351 large number of genes in the *Cgxbp1Δ* mutant during macrophage infection. In addition, the  
352 ChIP-seq experiment revealed that CgXbp1 directly binds to the promoter of many TFs  
353 including 10 carbon catabolite regulators (Figure 5G, Supplementary File 11), suggesting that  
354 CgXbp1 indirectly represses the activation of many gene regulatory networks. This probably  
355 explains the delayed activation of the carbon catabolic pathway genes. Therefore, CgXbp1  
356 exerts two-fold regulation; directly controlling downstream effector genes and indirectly  
357 affecting gene networks of diverse pathways via their hierarchies (i.e., TFs). Our overall  
358 findings suggest a regulatory model in which global transcriptional repression is established  
359 at the early infection stage to withhold transcriptional activation of certain genes whose  
360 functions are only required at later stages (Figure 7).

361         It is noteworthy that the *S. cerevisiae* orthologues of the other two uncharacterized  
362 proteins CgDal80 and CgRpa12 negatively regulate genes involved in nitrogen and lipid  
363 metabolism, respectively (Hofman-Bang, 1999; Yadav *et al.*, 2016). We postulate that these



364 repressors also act in the same fashion as CgXbp1 to delay induction of other groups of genes  
365 (such as nitrogen and lipid metabolism genes) that are not necessary for the immediate  
366 response but are required at later stages of macrophage infection and/or for proliferation.  
367 Repression may be relieved by protein turnover of the repressors and/or through enhanced  
368 activation by transcriptional activators. Therefore, the interplays between transcriptional  
369 activators and repressors (Figure 7) are crucial in shaping the dynamic transcriptional  
370 response during macrophage infection.

371 An attempt to identify CgXbp1 genome-wide binding targets during macrophage  
372 infection was made, however, we only managed to obtain one good quality dataset.  
373 Nevertheless, analysis of the CgXbp1 ChIP-seq result during quiescence (4-day-old culture)  
374 showed that CgXbp1 targets ~10% of all *C. glabrata* genes. Among the CgXbp1 binding  
375 sites, the motifs TCGAG and STVCN<sub>7</sub>TCT were significantly enriched. The former motif is  
376 similar to the recognition motif of ScXbp1 (TCGA), which was identified through promoter  
377 analysis and *in vitro* gel retardation and footprint experiments using recombinant ScXbp1  
378 (Mai and Breeden, 1997; Miles *et al.*, 2013), and is likely bound by CgXbp1 as a monomer or  
379 homo-dimer. Interestingly, the latter motif (STVCN<sub>7</sub>TCT) was found at a higher frequency  
380 (~3 fold) than the common TCGAG motif from the CgXbp1<sup>MYC</sup> binding sites, suggesting that  
381 CgXbp1 can also form a dimer with another transcription factor that recognizes the  
382 STVCN<sub>7</sub>TCT sequence and that this hetero-dimer controls a larger number of genes than by  
383 CgXbp1 alone.

384 The CgXbp1<sup>MYC</sup> ChIP-seq data also confirms the transcriptional phenotype of the  
385 *Cgxbp1*Δ mutant demonstrating that CgXbp1 is a pivotal regulator of many processes that  
386 contributes to the survival inside phagocytic cells (Lorenz and Fink, 2001; Rubin-Bejerano *et*  
387 *al.*, 2003; Rai *et al.*, 2012; Seider *et al.*, 2014). In addition, the data further revealed CgXbp1  
388 as an important regulator of drug resistance, linking *C. glabrata* macrophage response and

389 drug resistance. Therefore, this work uncovers a multifaceted transcriptional regulator  
390 important for the dynamic responses during macrophage infection and antifungal drug  
391 resistance in the human fungal pathogen *C. glabrata*.

392

## 393 **Methods**

### 394 **Culture conditions for *C. glabrata* and THP-1 macrophages**

395 *C. glabrata* strain BG2 was used as the wildtype in all experiments. A single colony  
396 of *C. glabrata* strains were cultured overnight (14-16 h) in YPD medium at 30°C and 200  
397 rpm in a shaker incubator. To obtain quiescence *C. glabrata* cells, cultures were grown in  
398 YPD medium at 30°C and 200 rpm for four days. The THP-1 cell line was obtained from  
399 ATCC (TIB 202). THP-1 cells were grown in RPMI medium supplemented with 20 mM  
400 glutamine, antibiotic (penicillin-streptomycin, 1X), and 10% heat-denatured serum at 37°C  
401 with 5% CO<sub>2</sub> in a cell culture incubator.

402

### 403 ***C. glabrata* infection of macrophages for RNAPII ChIP-seq**

404 Macrophage infection assays were done as described previously (Rai *et al.*, 2013).  
405 THP-1 monocytes were grown till 80% confluence, harvested, and re-suspended in RPMI  
406 medium at a cell density of 1 x 10<sup>6</sup> cells/mL. For macrophage differentiation, Phorbol-12-  
407 myristate 13-acetate (PMA) was added to the THP-1 monocytes at a final concentration of 16  
408 nM. Approximately 10 million cells were seeded in 100 mm culture dishes and incubated for  
409 12 hours at 37°C with 5% CO<sub>2</sub> in a cell culture incubator. Subsequently, the culture medium  
410 was replaced with fresh pre-warmed complete RPMI medium to remove PMA, and cells  
411 were allowed to recover in the absence of PMA for 12 hours. Macrophage differentiation and  
412 adherence were confirmed under the microscope. Overnight grown *C. glabrata* cells were  
413 harvested, washed with PBS and finally suspended in complete RPMI medium at a density of

414  $10^8$  yeasts/ml. To infect THP-1 macrophages, 500  $\mu\text{L}$  yeast cell suspension ( $5 \times 10^7$  yeast  
415 cells) was added to each culture dish containing differentiated THP-1 macrophages at a MOI  
416 of 5:1. Post 0.5 h macrophage infection, THP-1 macrophages were crosslinked using  
417 formaldehyde at a final concentration of 1% for 20 minutes before 1.5 mL of 2.5 M glycine  
418 (a final concentration of 320 nM) was added to stop the crosslinking reaction. For the  
419 remaining time points (2 h, 4 h, 6 h and 8 h), culture dishes were washed gently with PBS  
420 three times to remove non-phagocytosed yeast cells, and the medium was replaced with fresh  
421 pre-warmed RPMI medium. The infected culture was further incubated until the indicated  
422 infection times before formaldehyde crosslinking as described above, infected macrophage  
423 cultures were harvested and washed three times with ice-cold TBS before storing in  $-80^\circ\text{C}$   
424 freezer till chromatin extraction.

425

#### 426 **ChIP and Illumina sequencing library preparation**

427 Chromatin was prepared using a previously described protocol (Fan et al., 2008) with  
428 modifications. Briefly, the infected macrophage cell pellet was resuspended in 400  $\mu\text{L}$  FA  
429 lysis buffer and 10  $\mu\text{L}$  of 100 mM PMSF solution in the presence of 100  $\mu\text{L}$  equivalent  
430 zirconium beads and lysed using six 3-min cycles at maximum speed in a Bullet Blender<sup>®</sup>  
431 (Next Advance) homogeniser with at least 3 min of cooling on ice in between each cycle.  
432 Cell lysate was transferred to a new 1.5 mL tube and centrifuged at 2500 g for 5 min in a  
433 microcentrifuge. The supernatant was discarded, and the resultant pellet was re-suspended in  
434 500  $\mu\text{L}$  FA lysis buffer, and then transferred to a 2 mL screw-cap tube. Sonication was  
435 carried to shear the crosslinked chromatin (cycles of 10 sec on and 15 sec off sonication for a  
436 total of 30 min sonication time), and chromatin was stored in the  $-80^\circ\text{C}$  freezer until use.  
437 Chromatin immuno-precipitation was carried out using 2  $\mu\text{L}$  of a commercially available  
438 anti-RNA polymerase II subunit B1 phospho-CTD Ser-5 antibody (Millipore, clone 3E8, cat.

439 no. 04-1572) for RNAP II, and anti-MYC tag antibody (Santa Cruz, cat. no. 9E10) for  
440 CgXbp1<sup>MYC</sup>. The sample was gently mixed on an end-to-end rotator at room temperature for  
441 1.5 h, and 10  $\mu$ L of packed protein A sepharose beads (GE Healthcare cat. no. 17-0618-01)  
442 were then added. The mixture was further incubated at room temperature for another 1.5 h  
443 with gentle mixing. Immuno-precipitated material was washed twice with FA lysis buffer  
444 (150 mM NaCl), and once with FA lysis buffer (500 mM NaCl), LiCl wash buffer and TE  
445 buffer before elution in 100  $\mu$ L of elution buffer, as described previously (Wong and Struhl,  
446 2011). Eluted DNA was decrosslinked at 65°C overnight and purified using the QIAGEN  
447 PCR purification kit (cat. no. 28104). Sequencing library was generated using a multiplex  
448 Illumina sequencing protocol (Wong *et al.*, 2013) and sequenced using the Illumina  
449 HiSeq2500 platform at the Genomics and Single Cells Analysis Core facility at the  
450 University of Macau.

451

## 452 **Bioinformatics and ChIP-seq data analyses**

453 Raw fastq sequences were quality-checked using FastQC  
454 (<http://www.bioinformatics.babraham.ac.uk/projects/fastqc/>) aligned against the *C. glabrata*  
455 reference genome (CBS138\_s02-m07-r06) using bowtie2 (Langmead and Salzberg, 2012).  
456 To visualise the ChIP-seq data on the IGV (integrated genome viewer (Thorvaldsdóttir *et al.*,  
457 2012)), aligned reads were processed by MACS2 (Zhang *et al.*, 2008), and BigWig files were  
458 generated using ‘bedSort’ and ‘bedGraphToBigWig’ commands from UCSC Kent utils (Kent  
459 *et al.*, 2010). Samtools (version 1.9) was used to index the resultant BAM file and check for  
460 alignment statistics. For RNAPII ChIP-seq analysis, elongating RNAPII occupancy was  
461 measured by first counting the number of reads over the gene body for all annotated genes ( $n$   
462 = 5,311) and then normalising to gene length and sequencing depth using an in-house Perl  
463 script, and was expressed as normalised RNAPII ChIP-seq read counts. RNAPII occupancies

464 for all genes were ranked from high to low as shown in Figure 1-figure supplement 1, and  
465 manually inspected on the IGV to empirically determine a filtering cut-off that can reliably  
466 identify genes with significant and true RNAPII ChIP-seq signals. The normalised RNAPII  
467 ChIP-seq read counts values  $\geq 12$  and  $\geq 25$  were determined for wildtype and the *Cgxbp1* $\Delta$   
468 mutant, respectively. These values are approximately three times higher than the ChIP-seq  
469 signal at background regions (3.2 and 7.0 for wildtype and the *Cgxbp1* $\Delta$  mutant,  
470 respectively). To ensure that lowly expressed but transcriptionally induced genes were not  
471 missed, we searched for genes with the high standard deviation among RNAPII binding  
472 signals across the five time points and empirically determined a cut-off ( $SD \geq 2.25$  and  $\geq$   
473 4.00 for wildtype and the *Cgxbp1* $\Delta$  mutant, respectively) that includes most, if not all, genes  
474 with significant active transcription and/or changes in its level across the time course. This  
475 standard deviation-based approach identified 68 and 38 additional genes for wildtype and the  
476 *Cgxbp1* $\Delta$  mutant, respectively. The lists of shortlisted genes for wildtype and the *Cgxbp1* $\Delta$   
477 strains are given in Supplementary Files 1 and 5, respectively. Heatmap, k-means clustering  
478 and correlation plots were generated using an online tool FungiExpresZ  
479 (<https://cparsania.shinyapps.io/FungiExpresZ/>). GO-term enrichment, and GO slim mapping  
480 analyses were performed on the *Candida* genome database (Skrzypek *et al.*, 2017)  
481 (<http://www.candidagenome.org/GOContents.shtml>) and FungiDB (Stajich *et al.*, 2012)  
482 (<https://fungidb.org/fungidb/>). Transcription regulatory networks between transcription  
483 factors and their target genes (Figure 2-figure supplement 1A&B) were generated by the  
484 ‘Rank by TF’ function of PathoYeasttract (Monteiro *et al.*, 2020)  
485 (<http://pathoyeasttract.org/cglabrata/formrankbytf.php>) using published regulatory  
486 information of *S. cerevisiae*. For CgXbp1 ChIP-seq analysis, peak calling was done by  
487 MACS2 (Feng *et al.*, 2012) using the parameters [macs2 pileup --extsize 200] and then  
488 normalized [macs2 bdgopt]. Peaks obtained from MACS2 were assigned to the nearest gene

489 promoter using an in-house script. ChIP signal intensity at the 200 bp flanking regions of the  
490 peak summit from both replicates was used to determine correlation between the biological  
491 replicates (Figure 1-figure supplement 6, Figure 5-figure supplement 2).

492

### 493 **Generation of the CgXbp1<sup>MYC</sup>, Cgxbp1Δ and Cgxbp1Δ-pXBPI complemented strains**

494 CgXbp1<sup>MYC</sup> strain was generated as described previously (Qin *et al.*, 2019). Briefly,  
495 a transformation construct was generated using 1kb of 5' and 3' fragments, flanking the stop  
496 codon of *CAGL0G02739g* gene, with a 'MYC-*hph*' cassette between the two fragments. The  
497 5' fragment for CgXbp1<sup>MYC</sup> strain was amplified using primers 5'-  
498 ATATCGAATTCCTGCAGCCCTCCATGGTACATTGCAAAC-3', and 5'-  
499 TTAATTAACCCGGGGATCCGCACATTCTCTTGAAGATGGG-3' from *CAGL0G02739g*  
500 gene, and 3' fragment was same as for *Cgxbp1Δ* mutant. Hygromycin resistant yeast colonies  
501 were selected and tagging was confirmed PCR and Sanger sequencing. To create the  
502 *Cgxbp1Δ* mutant, 1 kb of 5' and 3' flanking regions of the *CAGL0G02739g* gene were  
503 amplified using PCR with the primers 5'-  
504 ATATCGAATTCCTGCAGCCCGGCCAACCCCACTTCGAGGA-3' and 5'-  
505 TTAATTAACCCGGGGATCCGTTAGTGATTTTGTAGTATGG-3' for the 5' flanking  
506 region and 5'-GTTTAAACGAGCTCGAATTCTCAAACATAATATAGTCATC-3' and 5'-  
507 CTAGAACTAGTGGATCCCCGAGAAGTTTTGGGTTGTACG-3' for the 3' flanking  
508 region. A transformation construct was created as described previously (Qin *et al.*, 2019)  
509 using the '*hph*' cassette encoding hygromycin resistance as the selectable marker and used to  
510 transform the *C. glabrata* wildtype strain (BG2). Hygromycin resistant yeast colonies were  
511 checked for deletion of the *CgXBPI* gene using PCR with the primers from gene internal  
512 regions (5'-TGGTGCTTTGGACGCTACAT-3' & 5'-TCATCGCAAAGCAATTGGACA-  
513 3'). To generate the complemented strain, *CgXBPI* ORF was first amplified using the

514 forward (5'- GAATTCATGAGACTCACAGACTCGCCGCT-3') and reverse (5'-  
515 GTCGACTTACACATTCTCTTGAAGATGGGT-3') primers from *C. glabrata* genomic  
516 DNA, digested with *EcoRI* and *SalI*, and cloned between *EcoRI* and *SalI* restriction sites of a  
517 CEN/ARS episomal plasmid, pCN-PDC1. The resultant plasmid, pXBP1, carrying *CgXBP1*  
518 ORF was transformed into *Cgxbp1Δ* mutant, and the resultant transformed complemented  
519 strain was selected on YPD plates carrying NAT (100μg/mL).

520

### 521 **Cell cycle analysis of intracellular *C. glabrata* cells in THP-1 macrophages**

522 For cell cycle analyses, THP-1 macrophages were infected with *C. glabrata* cells in  
523 24-well cell culture plate as described above. In control wells, we inoculated an equal number  
524 of *C. glabrata* cells to RPMI medium. Post 2 h incubation, *C. glabrata* cells were harvested  
525 and washed twice with 1 mL PBS. Next, harvested cells were fixed by re-suspending them in  
526 1 mL of 70% ethanol, followed by incubation at room temperature on a rotator for 60  
527 minutes. Fixed cells were pelleted and re-suspended in 1 mL of 50 mM sodium citrate (pH  
528 7.0), and were sonicated for 15 seconds at 30% power to re-suspend cell aggregates.  
529 Subsequently, samples were treated with RNase cocktail (0.3 μL, Ambion cat. no. AM2286)  
530 at 37°C for 1 h to remove RNA, washed with PBS, and stained with propidium iodide (PI)  
531 for 1 hour. Cells were then passed through a 40 μm membrane filter and were analysed on the  
532 BD Accuri C6 flow cytometer (excitation: 488nm Laser, filter: 585/40, and detector: FL2).

533

### 534 ***C. glabrata* infection of macrophages for determining viability using colony forming unit** 535 **assay**

536 Macrophage fungi infection assays were done as described earlier (Rai *et al.*, 2013).  
537 To prepare macrophages for infection assay, THP-1 monocytes were grown till 80%  
538 confluence, harvested, and resuspended to a cell density of 10<sup>6</sup> cells/ml in complete RPMI

539 medium. Phorbol-13-myristyl-acetate (PMA) was added to the cell suspension to 16 nM final  
540 concentration, mixed well, and 1 million cells were seeded in each well of a 24 well cell  
541 culture plate. Cells were incubated for 12 hours in a cell culture incubator, the medium was  
542 replaced with fresh pre-warmed complete RPMI medium, cells were allowed to recover from  
543 PMA stress for 12 hours. Macrophage differentiation and adherence were confirmed under  
544 the microscope. Overnight grown *C. glabrata* cells were harvested, washed with PBS and  
545 adjusted to 0.1 OD<sup>600</sup> and resuspended in complete RPMI medium. 100 µL yeast cell  
546 suspension was added to each well of the 24 well culture plate containing differentiated THP-  
547 1 macrophages. Post 2-hour co-incubation, wells were washed three times with PBS to  
548 remove non-phagocytosed yeast cells and the medium was replaced. At indicated time post-  
549 infection, the supernatant was aspirated out from the wells, and macrophages were lysed in  
550 sterile water and incubated for 5 minutes for lysing the macrophages. Lysates containing  
551 fungal cells were collected, diluted appropriately in PBS, and plated on YPD mediums. Plates  
552 were incubated for two days at 30°C and colonies were counted after 48 hours. The viability  
553 of *C. glabrata* cells was determined by comparing the colony forming units.

554

#### 555 ***Galleria mellonella* infection assay for virulence analyses**

556 Indicated *C. glabrata* strains were grown in YPD medium overnight, washed with  
557 PBS thrice, and resuspended in PBS to a final cell density of 10<sup>8</sup> cells/ml. Next, 20 µL of this  
558 cell suspension carrying 2 x 10<sup>6</sup> *C. glabrata* cells were used to infect *G. mellonella* larvae.  
559 The infection was carried out three independent times, each on 16 to 20 larvae. An equal  
560 volume of PBS was injected into the control set of larvae. Infected larvae were transferred to  
561 a 37°C incubator, and monitored for melanin formation, morbidity and mortality for the next  
562 seven days at every 24 hours. The number of live and dead larvae was noted for seven days,  
563 and the percentage of *G. mellonella* larvae survival was calculated.



564

### 565 **Serial dilution spotting assay**

566 *C. glabrata* strains were grown in YPD medium for 14-16 h at 30°C under continuous  
567 shaking at 200 rpm. Cells were harvested from 1 ml culture, washed with PBS, and were  
568 diluted to an OD<sub>600</sub> of 1. Next, five ten-fold serial dilutions were prepared from an initial  
569 culture of 1 OD<sub>600</sub>. Subsequently, 3 µL of each dilution was spotted on YPD plates with or  
570 without fluconazole (32 & 64 µg/mL). Plates were incubated at 30°C and images were  
571 captured after 2-8 days of incubation.

572

### 573 **Growth curve analyses**

574 A single colony of the indicated strains was inoculated to liquid YPD medium and  
575 grown for 14-16 h. The overnight grown culture was used to inoculate to YPD medium with  
576 or without 64 µg/mL fluconazole at an initial OD<sub>600</sub> of 0.1 in a 96-well culture plate. The  
577 culture plate was transferred to a 96 well-plate reader, Cytation3, set at 30°C and 100 rpm.  
578 The absorbance of cultures was recorded at OD<sub>600</sub> nm at regular intervals of 30 minutes over  
579 a period of 48 h. Absorbance values were used to plot the growth curve.

580

### 581 **Protein extraction and western blotting**

582 For protein extraction from macrophage-internalized *C. glabrata* cells, THP-1  
583 macrophages were infected as described above. At the indicated time post-infection,  
584 macrophages were lysed in sterile chilled water, and phagocytosed *C. glabrata* cells were  
585 recovered and washed with 1X TBS buffer, transferred into 1.5 ml microcentrifuge tubes, and  
586 stored at -80°C until use. *C. glabrata* cell pellets were resuspended in 1X lysis buffer (50 mM  
587 HEPES, pH 7.5; 200 mM NaOAc, pH 7.5; 1 mM EDTA, 1 mM EGTA, 5 mM MgOAc, 5%  
588 Glycerol, 0.25% NP-40, 3 mM DTT and 1 mM PMSF) supplemented with protease inhibitor

589 cocktail (Roche). Zirconium beads equivalent to 100  $\mu$ L volume was added in  
590 microcentrifuge tubes and resuspended cells were lysed by 6 rounds of bead beating on a  
591 bullet blender. The sample was centrifuged at 12,000g at 4°C for 10 minutes. Supernatant  
592 was carefully transferred to a new tube, and the resultant protein sample was quantified using  
593 Biorad protein assay kit (DC protein assay kit, cat. no. 5000116), and stored in -80°C freezer.  
594 For western analysis, 25  $\mu$ g of protein samples were resolved on 12% SDS-PAGE gel and  
595 blotted on methanol activated PVDF membrane (350 mA, 75 minutes in cold room). PVDF  
596 membrane was transferred to 5% fat-free milk prepared in 1X TBST for blocking and  
597 incubated for 1 hour. Membranes were probed with appropriate primary (anti c-MYC  
598 antibody, Santa Cruz, cat. no. 9E10 and anti-Histone H3 antibody, Abcam, cat. no. ab1791)  
599 and secondary (goat anti-mouse IgG, Merck Millipore, cat. no. AP124P) antibodies, and  
600 Blots were developed by chemiluminescence based ECL western detection kit (GE  
601 Healthcare, cat. no. RPN2236) on Chemidoc<sup>TM</sup> gel imaging system.

602

### 603 **Data availability**

604 RNAPII ChIP-seq and CgXbp1<sup>MYC</sup> ChIP-seq data are available from the NCBI SRA  
605 database under the accession number PRJNA665114 and PRJNA743592, respectively.

606

607 **References**

- 608 Abramova N, Sertil O, Mehta S, Lowry C V. 2001. Reciprocal regulation of anaerobic and  
609 aerobic cell wall mannoprotein gene expression in *Saccharomyces cerevisiae*. *J*  
610 *Bacteriol* **183**:2881–2887. doi:10.1128/JB.183.9.2881-2887.2001
- 611 Bailey TL, Boden M, Buske FA, Frith M, Grant CE, Clementi L, Ren J, Li WW, Noble WS.  
612 2009. MEME SUITE: tools for motif discovery and searching. *Nucleic Acids Res*  
613 **37**:W202-8. doi:10.1093/nar/gkp335
- 614 Benedict K, Richardson M, Vallabhaneni S, Jackson BR, Chiller T. 2017. Emerging issues,  
615 challenges, and changing epidemiology of fungal disease outbreaks. *Lancet Infect Dis*  
616 **17**:e403–e411. doi:[https://doi.org/10.1016/S1473-3099\(17\)30443-7](https://doi.org/10.1016/S1473-3099(17)30443-7)
- 617 Bongomin F, Gago S, Oladele RO, Denning DW. 2017. Global and Multi-National  
618 Prevalence of Fungal Diseases-Estimate Precision. *J fungi (Basel, Switzerland)* **3**.  
619 doi:10.3390/jof3040057
- 620 Brown GD. 2011. Innate antifungal immunity: the key role of phagocytes. *Annu Rev*  
621 *Immunol* **29**:1–21. doi:10.1146/annurev-immunol-030409-101229
- 622 Costa C, Henriques A, Pires C, Nunes J, Ohno M, Chibana H, Sá-Correia I, Teixeira M.  
623 2013. The dual role of *Candida glabrata* drug/H<sup>+</sup> antiporter CgAqr1 (ORF  
624 *CAGL0J09944g*) in antifungal drug and acetic acid resistance. *Front Microbiol* **4**:170.  
625 doi:10.3389/fmicb.2013.00170
- 626 Costa C, Ribeiro J, Miranda IM, Silva-Dias A, Cavalheiro M, Costa-de-Oliveira S, Rodrigues  
627 AG, Teixeira MC. 2016. Clotrimazole Drug Resistance in *Candida glabrata* Clinical  
628 Isolates Correlates with Increased Expression of the Drug/H(+) Antiporters CgAqr1,  
629 CgTpo1\_1, CgTpo3, and CgQdr2. *Front Microbiol* **7**:526.  
630 doi:10.3389/fmicb.2016.00526
- 631 Erwig LP, Gow NAR. 2016. Interactions of fungal pathogens with phagocytes. *Nat Rev*

- 632 *Microbiol* **14**:163–176. doi:10.1038/nrmicro.2015.21
- 633 Fan X, Lamarre-Vincent N, Wang Q, Struhl K. 2008. Extensive chromatin fragmentation  
634 improves enrichment of protein binding sites in chromatin immunoprecipitation  
635 experiments. *Nucleic Acids Res* **36**:e125. doi:10.1093/nar/gkn535
- 636 Feng J, Liu T, Qin B, Zhang Y, Liu XS. 2012. Identifying ChIP-seq enrichment using  
637 MACS. *Nat Protoc* **7**:1728–1740. doi:10.1038/nprot.2012.101
- 638 Hallstrom TC, Katzmann DJ, Torres RJ, Sharp WJ, Moye-Rowley WS. 1998. Regulation of  
639 transcription factor Pdr1p function by an Hsp70 protein in *Saccharomyces cerevisiae*.  
640 *Mol Cell Biol* **18**:1147–1155. doi:10.1128/mcb.18.3.1147
- 641 Hofman-Bang J. 1999. Nitrogen catabolite repression in *Saccharomyces cerevisiae*. *Mol*  
642 *Biotechnol* **12**:35–73. doi:10.1385/MB:12:1:35
- 643 Jacobsen ID. 2014. *Galleria mellonella* as a model host to study virulence of *Candida*.  
644 *Virulence*. doi:10.4161/viru.27434
- 645 Joffrion TM, Cushion MT. 2010. Sterol biosynthesis and sterol uptake in the fungal pathogen  
646 *Pneumocystis carinii*. *FEMS Microbiol Lett* **311**:1–9. doi:10.1111/j.1574-  
647 6968.2010.02007.x
- 648 Kasper L, Seider K, Hube B. 2015. Intracellular survival of *Candida glabrata* in  
649 macrophages: immune evasion and persistence. *FEMS Yeast Res* **15**:fov042.  
650 doi:10.1093/femsyr/fov042
- 651 Kaur R, Domergue R, Zupancic ML, Cormack BP. 2005. A yeast by any other name:  
652 *Candida glabrata* and its interaction with the host. *Curr Opin Microbiol* **8**:378–384.  
653 doi:10.1016/j.mib.2005.06.012
- 654 Kaur R, Ma B, Cormack BP. 2007. A family of glycosylphosphatidylinositol-linked aspartyl  
655 proteases is required for virulence of *Candida glabrata*. *Proc Natl Acad Sci USA*  
656 **104**:7628–7633. doi:10.1073/pnas.0611195104

- 657 Kent WJ, Zweig AS, Barber G, Hinrichs AS, Karolchik D. 2010. BigWig and BigBed:  
658 Enabling browsing of large distributed datasets. *Bioinformatics* **26**:2204–2207.  
659 doi:10.1093/bioinformatics/btq351
- 660 Lamoth F, Lockhart SR, Berkow EL, Calandra T. 2018. Changes in the epidemiological  
661 landscape of invasive candidiasis. *J Antimicrob Chemother* **73**:i4–i13.  
662 doi:10.1093/jac/dkx444
- 663 Langmead B, Salzberg SL. 2012. Fast gapped-read alignment with Bowtie 2. *Nat Methods*  
664 **9**:357–359. doi:10.1038/nmeth.1923
- 665 Leipheimer J, Bloom ALM, Campomizzi CS, Salei Y, Panepinto JC. 2019. Translational  
666 Regulation Promotes Oxidative Stress Resistance in the Human Fungal Pathogen  
667 *Cryptococcus neoformans*. *MBio* **10**. doi:10.1128/mBio.02143-19
- 668 Lorenz MC, Bender JA, Fink GR. 2004. Transcriptional response of *Candida albicans* upon  
669 internalization by macrophages. *Eukaryot Cell* **3**:1076–1087. doi:10.1128/EC.3.5.1076-  
670 1087.2004
- 671 Lorenz MC, Fink GR. 2001. The glyoxylate cycle is required for fungal virulence. *Nature*  
672 **412**:83–86. doi:10.1038/35083594
- 673 Mai B, Breeden L. 1997. Xbp1, a stress-induced transcriptional repressor of the  
674 *Saccharomyces cerevisiae* Swi4/Mbp1 family. *Mol Cell Biol* **17**:6491–6501.  
675 doi:10.1128/mcb.17.11.6491
- 676 Marzluf GA. 1997. Genetic regulation of nitrogen metabolism in the fungi. *Microbiol Mol*  
677 *Biol Rev* **61**:17–32.
- 678 Miles S, Li L, Davison J, Breeden LL. 2013. Xbp1 Directs Global Repression of Budding  
679 Yeast Transcription during the Transition to Quiescence and Is Important for the  
680 Longevity and Reversibility of the Quiescent State. *PLOS Genet* **9**:1–14.  
681 doi:10.1371/journal.pgen.1003854

- 682 Miyazaki H, Miyazaki Y, Geber A, Parkinson T, Hitchcock C, Falconer DJ, Ward DJ,  
683 Marsden K, Bennett JE. 1998. Fluconazole resistance associated with drug efflux and  
684 increased transcription of a drug transporter gene, PDH1, in *Candida glabrata*.  
685 *Antimicrob Agents Chemother* **42**:1695–1701.
- 686 Monteiro PT, Oliveira J, Pais P, Antunes M, Palma M, Cavalheiro M, Galocha M, Godinho  
687 CP, Martins LC, Bourbon N, Mota MN, Ribeiro RA, Viana R, Sá-Correia I, Teixeira  
688 MC. 2020. YEASTRACT+: a portal for cross-species comparative genomics of  
689 transcription regulation in yeasts. *Nucleic Acids Res* **48**:D642–D649.  
690 doi:10.1093/nar/gkz859
- 691 Pais P, Costa C, Pires C, Shimizu K, Chibana H, Teixeira MC. 2016. Membrane Proteome-  
692 Wide Response to the Antifungal Drug Clotrimazole in *Candida glabrata*: Role of the  
693 Transcription Factor CgPdr1 and the Drug/H<sup>+</sup> Antiporters CgTpo1\_1 and CgTpo1\_2.  
694 *Mol Cell Proteomics* **15**:57–72. doi:10.1074/mcp.M114.045344
- 695 Qin L, Li A, Tan K, Guo S, Chen Y, Wang F, Wong KH. 2019. Universal plasmids to  
696 facilitate gene deletion and gene tagging in filamentous fungi. *Fungal Genet Biol*  
697 **125**:28–35. doi:10.1016/j.fgb.2019.01.004
- 698 Rai MN, Balusu S, Gorityala N, Dandu L, Kaur R. 2012. Functional Genomic Analysis of  
699 *Candida glabrata*-Macrophage Interaction: Role of Chromatin Remodeling in  
700 Virulence. *PLoS Pathog* **8**. doi:10.1371/journal.ppat.1002863
- 701 Rai MN, Borah S, Bairwa G, Balusu S, Gorityala N, Kaur R. 2013. Establishment of an in  
702 vitro system to study intracellular behavior of *Candida glabrata* in human THP-1  
703 macrophages. *J Vis Exp*.
- 704 Rodrigues CF, Rodrigues ME, Silva S, Henriques M. 2017. *Candida glabrata* Biofilms: How  
705 Far Have We Come? *J fungi (Basel, Switzerland)* **3**. doi:10.3390/jof3010011
- 706 Rubin-Bejerano I, Fraser I, Grisafi P, Fink GR. 2003. Phagocytosis by neutrophils induces an

- 707 amino acid deprivation response in *Saccharomyces cerevisiae* and *Candida albicans*.  
708 *Proc Natl Acad Sci USA* **100**:11007–11012. doi:10.1073/pnas.1834481100
- 709 Seider K, Brunke S, Schild L, Jablonowski N, Wilson D, Majer O, Barz D, Haas A, Kuchler  
710 K, Schaller M, Hube B. 2011. The facultative intracellular pathogen *Candida glabrata*  
711 subverts macrophage cytokine production and phagolysosome maturation. *J Immunol*  
712 **187**:3072–3086. doi:10.4049/jimmunol.1003730
- 713 Seider K, Gerwien F, Kasper L, Allert S, Brunke S, Jablonowski N, Schwarzmüller T, Barz  
714 D, Rupp S, Kuchler K, Hube B. 2014. Immune evasion, stress resistance, and efficient  
715 nutrient acquisition are crucial for intracellular survival of *Candida glabrata* within  
716 macrophages. *Eukaryot Cell* **13**:170–183. doi:10.1128/EC.00262-13
- 717 Seider K, Heyken A, Lüttich A, Miramón P, Hube B. 2010. Interaction of pathogenic yeasts  
718 with phagocytes: survival, persistence and escape. *Curr Opin Microbiol* **13**:392–400.  
719 doi:10.1016/j.mib.2010.05.001
- 720 Skrzypek MS, Binkley J, Binkley G, Miyasato SR, Simison M, Sherlock G. 2017. The  
721 *Candida* Genome Database (CGD): incorporation of Assembly 22, systematic  
722 identifiers and visualization of high throughput sequencing data. *Nucleic Acids Res*  
723 **45**:D592–D596. doi:10.1093/nar/gkw924
- 724 Stajich JE, Harris T, Brunk BP, Brestelli J, Fischer S, Harb OS, Kissinger JC, Li W, Nayak  
725 V, Pinney DF, Stoeckert CJJ, Roos DS. 2012. FungiDB: an integrated functional  
726 genomics database for fungi. *Nucleic Acids Res* **40**:D675-81. doi:10.1093/nar/gkr918
- 727 Tan K, Wong KH. 2019. RNA polymerase II ChIP-seq-a powerful and highly affordable  
728 method for studying fungal genomics and physiology. *Biophys Rev*.  
729 doi:10.1007/s12551-018-00497-9
- 730 Thorvaldsdóttir H, Robinson JT, Mesirov JP. 2012. Integrative Genomics Viewer (IGV):  
731 high-performance genomics data visualization and exploration. *Brief Bioinform* **14**:178–

- 732 192. doi:10.1093/bib/bbs017
- 733 Wong KH, Jin Y, Moqtaderi Z. 2013. Multiplex Illumina sequencing using DNA barcoding.  
734 *Curr Protoc Mol Biol* **Chapter 7**:Unit 7.11. doi:10.1002/0471142727.mb0711s101
- 735 Wong KH, Struhl K. 2011. The Cyc8-Tup1 complex inhibits transcription primarily by  
736 masking the activation domain of the recruiting protein. *Genes Dev* **25**:2525–2539.  
737 doi:10.1101/gad.179275.111
- 738 Yadav KK, Singh N, Rajvanshi PK, Rajasekharan R. 2016. The RNA polymerase I subunit  
739 Rpa12p interacts with the stress-responsive transcription factor Msn4p to regulate lipid  
740 metabolism in budding yeast. *FEBS Lett*. doi:10.1002/1873-3468.12422
- 741 Zhang Y, Liu T, Meyer CA, Eeckhoute J, Johnson DS, Bernstein BE, Nusbaum C, Myers  
742 RM, Brown M, Li W, Liu XS. 2008. Model-based analysis of ChIP-Seq (MACS).  
743 *Genome Biol* **9**:R137. doi:10.1186/gb-2008-9-9-r137
- 744



745 **Acknowledgements**

746 We thank members of the Wong laboratory for their valuable comments throughout  
747 the study. We acknowledge the services and technical supports from the Genomics and  
748 Single Cell Analysis Core and the Drug and Development Core of the Faculty of Health  
749 Sciences at the University of Macau. This work was performed in part at the High-  
750 Performance Computing Cluster (HPCC), which is supported by the Information and  
751 Communication Technology Office (ICTO) of the University of Macau. We thank  
752 Lakhansing Pardeshi and Zhengqiang Miao, for Bioinformatics supports and Jacky Chan for  
753 technical supports on the HPC. This work was supported by the Research Services and  
754 Knowledge Transfer Office of the University of Macau (Grant number: MYRG2019-00099-  
755 FHS) and the Collaborative Research Fund Equipment Grant (C5012-15E) from the Research  
756 Grant Council, Hong Kong Government.

757

758 **Author contributions**

759 M.N.R. and K.H.W conceived the study, designed experiments and interpreted data.  
760 M.N.R. and R.R. performed experiments. M.N.R, C.P. and N.S. performed Bioinformatics  
761 analysis. K.T. performed Illumina sequencing and provided technical supports. K.T. and  
762 K.H.W. provided funding and resources. M.N.R. and K.H.W. wrote the manuscript.

763

764 **Competing interest declaration**

765 The authors declare no conflict of interest.

766

767 **Figure Legends**

768 **Figure 1: *C. glabrata* mounts a dynamic chronological transcriptional response upon**  
769 **macrophage infection. (A)** A schematic diagram showing the overall methodology used in  
770 this study. **(B)** Genome browser views of RNAPII ChIP-seq signals on *CgCYC1*, *CgCIT2*,  
771 *CgICL1*, *CgFTRI*, *CgTRR1* and *CgMT-I* genes at indicated time points. Numbers in the  
772 square brackets indicate the y-axis scale range of normalized RNAPII ChIP-seq signal used  
773 for the indicated genes across different datasets. **(C)** A heatmap showing temporal expression  
774 patterns of transcribed genes in *C. glabrata* during 0.5 to 8 h macrophage infection in a time-  
775 course experiment. The colour scale represents the Z-score of the normalized RNAPII ChIP-  
776 seq signal. **(D)** A table showing significantly enriched GO biological processes (P value  $\leq$   
777 0.05) for the six groups of temporally transcribed genes. **(E)** A schematic diagram showing  
778 *C. glabrata* transcriptional responses (broadly classified into early, intermediate and late  
779 stages) during macrophage infection.

780

781 **Figure 1-figure supplement 1: High-resolution RNAPII ChIP-seq can capture genome-**  
782 **wide active and temporally induced transcription activities in *C. glabrata* during**  
783 **macrophage infection. (A)** A heatmap displaying RNAPII ChIP-seq signal over the gene  
784 body and 200 bp upstream and downstream regions for all *C. glabrata* genes after 0.5, 2, 4, 6  
785 and 8 h of THP-1 macrophage infection. The colour scale represents the normalized RNAPII  
786 ChIP-seq signal. **(B)** Genome browser screenshots showing RNAPII ChIP-seq signal on  
787 selected constitutively transcribed genes. **(C)** Genome browser screenshots showing RNAPII  
788 ChIP-seq signal on selected temporally induced *C. glabrata* genes. Numbers in the square  
789 brackets indicate the y-axis scale range of normalized RNAPII ChIP-seq signal used for the  
790 indicated genes across different datasets.

791

792 **Figure 1-figure supplement 2: *C. glabrata* undergoes cell cycle arrest upon macrophage**  
793 **phagocytosis. (A)** Heatmaps showing the expression pattern for cell cycle and DNA damage  
794 checkpoint genes during macrophage infection. The colour scale represents the Z-score of the  
795 normalized RNAPII ChIP-seq signal. **(B)** A density plot displaying the distribution of *C.*  
796 *glabrata* cells at different cell cycle stages based on FACS analysis at 2 h after THP-1  
797 macrophage infection.

798

799 **Figure 1-figure supplement 3: Virulence-centric biological processes are temporally**  
800 **activated in *C. glabrata* at different stages of macrophage infection. (A-G)** Heatmaps  
801 displaying the expression pattern for genes associated with biological processes (A)  
802 Adhesion, (B) DNA repair, (C) Response to oxidative stress, (D) Autophagy, (E) TCA cycle,  
803 (F) Amino acid biosynthesis and (G) Iron homeostasis during THP-1 macrophage infection.  
804 The colour scale represents the Z-score of the normalized RNAPII ChIP-seq signal.

805

806 **Figure 1-figure supplement 4: Genes encoding histones or proteins involved in**  
807 **chromatin modification and remodelling are transcriptionally induced in *C. glabrata***  
808 **during the early stages of macrophage infection. (A&B)** Heatmaps showing the expression  
809 pattern for (A) histone H2A, H2B, H3, and H4 genes and putative (B) chromatin and histone  
810 modifiers genes during THP-1 macrophage infection. The colour scale represents the Z-score  
811 of the normalized RNAPII ChIP-seq signal.

812

813 **Figure 1-figure supplement 5: TIR family genes for sterol uptake displaying co-**  
814 **expression during macrophage infection.** Genome browser screenshots showing RNAPII  
815 ChIP-seq profile on putative TIR family genes for sterol uptake during THP-1 macrophage  
816 infection.

817

818 **Figure 1-figure supplement 6: Correlation between independent biological repeats of**

819 **the RNAPII ChIP-seq experiment for wildtype and the *Cgxbp1*Δ mutant. (A&B)**

820 Scatterplots showing RNAPII ChIP-seq signals between two independent biological repeats

821 for (A) wildtype and (B) the *Cgxbp1*Δ mutant at the indicated times. The correlation

822 coefficient (r) for each comparison is presented.

823

824 **Figure 2: CgXbp1 is central in orchestrating the dynamic transcriptional response of *C.***

825 ***glabrata* during macrophage infection. (A)** A heatmap showing temporal expression

826 patterns of *C. glabrata* transcription factor genes transcribed during THP-1 macrophage

827 infection. Colour scale represents the Z-score of the normalized RNAPII ChIP-seq signal. **(B)**

828 A heatmap showing temporal expression patterns of transcribed genes in the *Cgxbp1*Δ mutant

829 during 0.5 to 8 h THP-1 macrophage infection in a time-course experiment. **(C)** An UpSet

830 plot showing the number of genes induced at the indicated time points in WT and the

831 *Cgxbp1*Δ mutant during THP-1 macrophage infection.

832

833 **Figure 2-figure supplement 1: CgXbp1 is a key transcription regulator of the temporal**

834 **transcriptional response of *C. glabrata* during macrophage infection. (A)** A regulatory

835 network of Xbp1 and Hap3 for the orthologue of macrophage infection-induced genes in *S.*

836 *cerevisiae* based on published regulatory information available on the PathoYeast database. Green, red, and black arrows indicate positive, negative, and unspecified regulation,

837 respectively. Solid and dashed lines represent DNA binding or expression-based evidence,

838 respectively. **(B)** A regulatory network of CgXBPI for a subset of infection-induced TF genes

839 based on published regulatory information available on the PathoYeast database. **(C)**

840

841 Venn diagram of actively transcribing genes in wildtype and the *Cgxbp1*Δ mutant during  
842 macrophage infection.

843

844 **Figure 3: Loss of *CgXBPI* affects the expression level and timing of multiple genes of**

845 **diverse physiological pathways upon macrophage phagocytosis. (A & B)** Heat maps

846 showing transcription activities of genes belonging to (A) TCA and (B) amino acid

847 biosynthesis during THP1 macrophage infection in wildtype and the *Cgxbp1*Δ mutant.

848

849 **Figure 3-figure supplement 1: *CgXbp1* is essential for the chronological transcriptional**

850 **response of *C. glabrata* during macrophage infection.** A table summarising the enrichment

851 of GO-terms among the transcribed *C. glabrata* genes at the indicated time points during

852 THP-1 macrophage infection by wildtype and the *Cgxbp1*Δ mutant. “Y” indicates a

853 statistically significant enrichment (P value < 0.05) in a given GO term, while a blank box

854 means no significant enrichment.

855

856 **Figure 4: Loss of *CgXBPI* affects *C. glabrata* proliferation in human macrophages and**

857 **attenuates virulence in the *Galleria mellonella* model of candidiasis. (A)** Bar chart of

858 CFUs obtained from *C. glabrata* cells harvested from THP-1 macrophages at indicated time

859 points. Error bars represent the standard error of the mean ( $\pm$ SEM) from 3 independent

860 experiments. Statistical significance was determined by two-sided unpaired Student’s *t*-test,

861 \*P value  $\leq$  0.05, \*\*P value  $\leq$  0.01. **(B)** Cumulative survival curve of *G. mellonella* larvae

862 infected with indicated *C. glabrata* strains. At least 16 larvae were used in each of three

863 independent infection experiments. The graph represents the per cent survival of larvae

864 infected with the indicated strains from three independent infection experiments. Statistical

865 significance was determined by a two-sided unpaired Student’s *t*-test, \*\*P value  $\leq$  0.01.

866

867 **Figure 4-figure supplement 1: Phagocytosis rate is not affected by CgXbp1 deletion.** Bar  
868 diagram displaying colony forming units obtained before macrophage infection and 2 h post-  
869 infection. Error bars represent mean  $\pm$  standard deviation from three independent  
870 experiments.

871

872 **Figure 5: CgXbp1 binds to a large number of genomic locations *in vivo*.** (A & B) Western  
873 blot analysis of CgXbp1 expression (A) during THP1 macrophage infection and (B) at  
874 exponential (Log) and quiescence phases (Day 2, 3 and 4) (Figure 5-Source data). (C & D)  
875 Representative genome-browser screenshots showing CgXbp1<sup>MYC</sup> ChIP-seq signal on (C) a  
876 chromosomal region and (D) the promoter of select genes. (E) A Heat map of ChIP-seq  
877 signal on promoters of CgXbp1 target genes. The colour scale indicates normalized ChIP-seq  
878 signal on 3 kb upstream and downstream flanking regions from the transcription start site  
879 (TSS) of the target genes. (F) Consensus DNA binding motifs enriched from CgXbp1 bound  
880 promoter sequences in CgXbp1 target genes by MEME analysis. (G) Genome-browser  
881 screenshots displaying CgXbp1 binding on *CgMIG1*, *CgADRI*, *CgCST6*, and *CgHAP4*  
882 promoters during the quiescence phase.

883

884 **Figure 5-figure supplement 1: Protein sequence comparison between CgXbp1 and**  
885 **ScXbp1.** Pairwise sequence alignment of amino acid sequences of *C. glabrata* ORF  
886 *CAGL0G02739g* and *S. cerevisiae* Xbp1. Black and grey shaded amino acid represents  
887 identical and similar amino acids, respectively. Boxed amino acid sequence marks the DNA  
888 binding domain.

889

890 **Figure 5-figure supplement 2: Biological replicates from two independent experiments**  
891 **for CgXbp1<sup>MYC</sup> ChIP-seq displayed a good correlation.** (A) Scatterplot showing  
892 correlation of ChIP-seq signal intensity at CgXbp1<sup>MYC</sup> peak summits and 200 bp flanking  
893 regions between two independent biological repeats during quiescence phase. (B) Heatmap  
894 showing ChIP-seq signals on CgXbp1<sup>MYC</sup> peak summits and 1500 bp flanking regions for  
895 two independent biological repeats and the input control.

896

897 **Figure 5-figure supplement 3: The two enriched motifs identified from CgXbp1 binding**  
898 **sites show good homology with *S. cerevisiae* Xbp1 and Azf1 DNA binding recognition**  
899 **motifs.** (A&B) TOMTOM suite identifies two motifs in *S. cerevisiae* transcription factors,  
900 Xbp1 (A) and Azf1 (B), conserved and similar to CgXbp1.

901

902 **Figure 6: CgXbp1 regulates fluconazole resistance in *C. glabrata*.** (A) Genome-browser  
903 screenshots showing CgXbp1<sup>MYC</sup> binding on the promoter of genes encoding drug efflux  
904 pumps, *CgPDH1*, *CgPDR13*, and *CgQDR2*. (B) Serial dilution spotting assay on YPD  
905 medium in the presence of different fluconazole concentrations (0, 32 or 64 µg/mL). (C)  
906 Growth curve of wildtype and *Cgxbp1Δ* mutant in YPD medium in the presence or absence  
907 of fluconazole (64 µg/mL). Error bars represent mean ± SEM from four independent  
908 experiments. (D) Bar graph displaying CFUs/mL obtained for indicated strains on YPD agar  
909 plates in the presence or absence of fluconazole (64 µg/mL) post 3 days of spread plating.  
910 Error bars represent mean ± SEM from three independent experiments. Statistical  
911 significance was determined by a two-sided unpaired Student's *t*-test, \*P value ≤ 0.05.

912

913 **Figure 7: A schematic diagram illustrating a proposed model for the regulation of**  
914 **transcriptional responses in *C. glabrata* during macrophage infection.** A model for the

915 regulation of the chronological transcriptional responses of *C. glabrata* during macrophage

916 infection. The model was created in BioRender.com.

917



918 **Table 1:** Constitutively transcribed or temporally induced *C. glabrata* transcription factor  
 919 genes during macrophage infection.

920

| <b>Table 1: Constitutively transcribed or temporally induced <i>C. glabrata</i> transcription factor genes during macrophage infection</b> |                       |                     |                       |                                                                   |
|--------------------------------------------------------------------------------------------------------------------------------------------|-----------------------|---------------------|-----------------------|-------------------------------------------------------------------|
| <b>Temporally induced</b>                                                                                                                  |                       |                     |                       |                                                                   |
| <b>Group number</b>                                                                                                                        | <b>Cg common name</b> | <b>Cg ORF name</b>  | <b>Sc common name</b> | <b>Sc gene desc</b>                                               |
| Group:1:(N=4)                                                                                                                              | <i>CAGLOG02739g</i>   | <i>CAGLOG02739g</i> | <i>XBP1</i>           | Xho1 site-Binding Protein                                         |
| Group:1:(N=4)                                                                                                                              | <i>CAGL0L03157g</i>   | <i>CAGL0L03157g</i> | <i>DAL80</i>          | Degradation of Allantoin                                          |
| Group:1:(N=4)                                                                                                                              | <i>CAGL0J04400g</i>   | <i>CAGL0J04400g</i> | <i>HAP3</i>           | Heme Activator Protein                                            |
| Group:1:(N=4)                                                                                                                              | <i>CAGL0F00561g</i>   | <i>CAGL0F00561g</i> | <i>RPA12</i>          | RNA Polymerase A                                                  |
| Group:2:(N=4)                                                                                                                              | <i>CAGL0K06413g</i>   | <i>CAGL0K06413g</i> | <i>STP1</i>           | Species-specific tRNA Processing                                  |
| Group:2:(N=4)                                                                                                                              | <i>CAGL0E00737g</i>   | <i>CAGL0E00737g</i> | <i>HMO1</i>           | High MObility group (HMG) family                                  |
| Group:2:(N=4)                                                                                                                              | <i>MET28</i>          | <i>CAGL0K08668g</i> | <i>MET28</i>          | METHionine                                                        |
| Group:2:(N=4)                                                                                                                              | <i>CAGL0J03608g</i>   | <i>CAGL0J03608g</i> | <i>HCM1</i>           | High-Copy suppressor of Calmodulin                                |
| Group:3:(N=5)                                                                                                                              | <i>RTG1</i>           | <i>CAGL0C05335g</i> | <i>RTG1</i>           | ReTroGrade regulation                                             |
| Group:3:(N=5)                                                                                                                              | <i>CAGL0J01177g</i>   | <i>CAGL0J01177g</i> | <i>ABF1</i>           | ARS-Binding Factor 1                                              |
| Group:3:(N=5)                                                                                                                              | <i>CAGL0K04543g</i>   | <i>CAGL0K04543g</i> | <i>SPT4</i>           | SuPpressor of Ty's                                                |
| Group:3:(N=5)                                                                                                                              | <i>HAP4</i>           | <i>CAGL0K08624g</i> | <i>HAP4</i>           | Heme Activator Protein                                            |
| Group:3:(N=5)                                                                                                                              | <i>CAGL0G07249g</i>   | <i>CAGL0G07249g</i> | <i>YHP1</i>           | Yeast Homeo-Protein                                               |
| Group:4:(N=4)                                                                                                                              | <i>CAGL0L07480g</i>   | <i>CAGL0L07480g</i> | <i>NRG2</i>           | Negative Regulator of Glucose-controlled genes                    |
| Group:4:(N=4)                                                                                                                              | <i>MIG1</i>           | <i>CAGL0A01628g</i> | <i>MIG1</i>           | Multicopy Inhibitor of GAL gene expression                        |
| Group:4:(N=4)                                                                                                                              | <i>CAGL0G08646g</i>   | <i>CAGL0G08646g</i> | <i>POG1</i>           | Promoter Of Growth                                                |
| Group:4:(N=4)                                                                                                                              | <i>CAGL0K02145g</i>   | <i>CAGL0K02145g</i> | <i>COM2</i>           | Cousin of Msn2                                                    |
| Group:5:(N=17)                                                                                                                             | <i>RME1</i>           | <i>CAGL0K04257g</i> | <i>RME1</i>           | Regulator of MEiosis                                              |
| Group:5:(N=17)                                                                                                                             | <i>CAGL0M07634g</i>   | <i>CAGL0M07634g</i> | <i>SOK2</i>           | Suppressor Of Kinase                                              |
| Group:5:(N=17)                                                                                                                             | <i>CAGL0M01716g</i>   | <i>CAGL0M01716g</i> | <i>TEC1</i>           | Transposon Enhancement Control                                    |
| Group:5:(N=17)                                                                                                                             | <i>CAGL0F07909g</i>   | <i>CAGL0F07909g</i> | <i>TBS1</i>           | ThiaBendazole Sensitive                                           |
| Group:5:(N=17)                                                                                                                             | <i>UPC2B</i>          | <i>CAGL0F07865g</i> | <i>UPC2</i>           | UPTake Control                                                    |
| Group:5:(N=17)                                                                                                                             | <i>ZAP1</i>           | <i>CAGL0J05060g</i> | <i>ZAP1</i>           | Zinc-responsive Activator Protein                                 |
| Group:5:(N=17)                                                                                                                             | <i>CAGL0C02519g</i>   | <i>CAGL0C02519g</i> | <i>MIG3</i>           | Multicopy Inhibitor of Growth                                     |
| Group:5:(N=17)                                                                                                                             | <i>HAP5</i>           | <i>CAGL0K09900g</i> | <i>HAP5</i>           | Heme Activator Protein                                            |
| Group:5:(N=17)                                                                                                                             | <i>CAGL0E04312g</i>   | <i>CAGL0E04312g</i> | <i>STP2</i>           | protein with similarity to Stp1p                                  |
| Group:5:(N=17)                                                                                                                             | <i>CAGL0B03421g</i>   | <i>CAGL0B03421g</i> | <i>HAP1</i>           | Heme Activator Protein                                            |
| Group:5:(N=17)                                                                                                                             | <i>HAA1</i>           | <i>CAGL0L09339g</i> | <i>HAA1</i>           | Homolog of Ace1 Activator                                         |
| Group:5:(N=17)                                                                                                                             | <i>GAT1</i>           | <i>CAGL0K07634g</i> | <i>GAT1</i>           | Transcriptional activator of nitrogen catabolite repression genes |
| Group:5:(N=17)                                                                                                                             | <i>YAP6</i>           | <i>CAGL0M08800g</i> | <i>YAP6</i>           | Yeast homolog of AP-1                                             |
| Group:5:(N=17)                                                                                                                             | <i>GLM6</i>           | <i>CAGL0J01595g</i> | #N/A                  | #N/A                                                              |
| Group:5:(N=17)                                                                                                                             | <i>AFT1</i>           | <i>CAGL0H03487g</i> | <i>AFT1</i>           | Activator of Ferrous Transport                                    |
| Group:5:(N=17)                                                                                                                             | <i>YAP3b</i>          | <i>CAGL0M10087g</i> | #N/A                  | #N/A                                                              |
| Group:5:(N=17)                                                                                                                             | <i>CAGL0E03762g</i>   | <i>CAGL0E03762g</i> | <i>RIM101</i>         | Regulator of IME2                                                 |
| Group:6:(N=5)                                                                                                                              | <i>AP5</i>            | <i>CAGL0K08756g</i> | <i>YAP5</i>           | Yeast AP-1                                                        |
| Group:6:(N=5)                                                                                                                              | <i>GCN4</i>           | <i>CAGL0L02475g</i> | <i>GCN4</i>           | General Control Nonderepressible                                  |
| Group:6:(N=5)                                                                                                                              | <i>CAGL0E05566g</i>   | <i>CAGL0E05566g</i> | <i>TYE7</i>           | Ty1-mediated Expression                                           |
| Group:6:(N=5)                                                                                                                              | <i>RPN4</i>           | <i>CAGL0K01727g</i> | <i>RPN4</i>           | Regulatory Particle Non-ATPase                                    |
| Group:6:(N=5)                                                                                                                              | <i>CAGL0C01551g</i>   | <i>CAGL0C01551g</i> | <i>TOS8</i>           | Target Of Sbf                                                     |
| <b>Constitutively transcribed</b>                                                                                                          |                       |                     |                       |                                                                   |
| <b>Group</b>                                                                                                                               | <b>Cg common name</b> | <b>Cg ORF name</b>  | <b>Sc common name</b> | <b>Sc gene desc</b>                                               |
| Constitutively transcribed                                                                                                                 | <i>PHO2</i>           | <i>CAGL0L07436g</i> | <i>PHO2</i>           | PHOSphate metabolism                                              |
| Constitutively transcribed                                                                                                                 | <i>AP1</i>            | <i>CAGL0H04631g</i> | <i>YAP1</i>           | Yeast AP-1                                                        |
| Constitutively transcribed                                                                                                                 | <i>CAGL0M04983g</i>   | <i>CAGL0M04983g</i> | <i>MBF1</i>           | Multiprotein Bridging Factor                                      |
| Constitutively transcribed                                                                                                                 | <i>MSN4</i>           | <i>CAGL0M13189g</i> | <i>MSN4</i>           | Multicopy suppressor of SNF1 mutation                             |
| Constitutively transcribed                                                                                                                 | <i>CAGL0E00891g</i>   | <i>CAGL0E00891g</i> | <i>STB3</i>           | Sin Three Binding protein                                         |
| Constitutively transcribed                                                                                                                 | <i>CAD1</i>           | <i>CAGL0F03069g</i> | <i>CAD1</i>           | CADmium resistance                                                |
| Constitutively transcribed                                                                                                                 | <i>CAGL0A04257g</i>   | <i>CAGL0A04257g</i> | <i>TOD6</i>           | Twin Of Dot6p                                                     |
| Constitutively transcribed                                                                                                                 | <i>CAGL0I08635g</i>   | <i>CAGL0I08635g</i> | <i>BUR6</i>           | Bypass UAS Requirement                                            |
| Constitutively transcribed                                                                                                                 | <i>YAP7</i>           | <i>CAGL0F01265g</i> | <i>YAP7</i>           | Yeast AP-1                                                        |
| Constitutively transcribed                                                                                                                 | <i>CAGL0L02013g</i>   | <i>CAGL0L02013g</i> | <i>IXR1</i>           | Intrastrand cross (X)-link Recognition                            |
| Constitutively transcribed                                                                                                                 | <i>CAGL0M01474g</i>   | <i>CAGL0M01474g</i> | <i>NCB2</i>           | Negative Cofactor B                                               |
| Constitutively transcribed                                                                                                                 | <i>CAGL0F06259g</i>   | <i>CAGL0F06259g</i> | <i>ARG80</i>          | ARGinine requiring                                                |
| Constitutively transcribed                                                                                                                 | <i>SWI5</i>           | <i>CAGL0E01331g</i> | <i>SWI5</i>           | SWItching deficient                                               |
| Constitutively transcribed                                                                                                                 | <i>CAGL0M09955g</i>   | <i>CAGL0M09955g</i> | <i>SFP1</i>           | Split Finger Protein                                              |

921

922 **Table 2:** Table of significantly enriched and non-redundant GO-terms for biological  
 923 processes among CgXbp1 target genes during quiescence phase, grouped based on biological  
 924 functions.

|                           | <b>GO Term</b>                                   | <b>P value</b> | <b>Genes in the background</b> | <b>CgXbp1 bound genes</b> |
|---------------------------|--------------------------------------------------|----------------|--------------------------------|---------------------------|
| <b>Transport</b>          | transmembrane transport                          | 1.19E-06       | 320                            | 47                        |
|                           | carboxylic acid transport                        | 3.13E-04       | 69                             | 14                        |
|                           | acetate transport                                | 1.40E-03       | 4                              | 3                         |
|                           | xenobiotic transport                             | 2.48E-03       | 9                              | 4                         |
|                           | oxygen transport                                 | 5.16E-03       | 2                              | 2                         |
|                           | fluconazole transport                            | 5.16E-03       | 2                              | 2                         |
|                           | drug transport                                   | 8.20E-03       | 12                             | 4                         |
|                           | ammonium transport                               | 1.04E-02       | 7                              | 3                         |
|                           | amino acid transport                             | 1.19E-02       | 44                             | 8                         |
|                           | glucose transmembrane transport                  | 1.57E-02       | 8                              | 3                         |
| <b>Response to stress</b> | response to nutrient                             | 6.93E-04       | 58                             | 12                        |
|                           | cellular response to chemical stress             | 1.36E-03       | 184                            | 25                        |
|                           | response to nitrosative stress                   | 1.46E-03       | 8                              | 4                         |
|                           | response to acetate                              | 3.31E-03       | 5                              | 3                         |
|                           | cellular response to oxidative stress            | 5.09E-03       | 130                            | 18                        |
|                           | response to osmotic stress                       | 1.07E-02       | 99                             | 14                        |
|                           | response to oxidative stress                     | 1.13E-02       | 151                            | 19                        |
|                           | response to salt stress                          | 1.70E-02       | 38                             | 7                         |
|                           | response to pH                                   | 1.76E-02       | 85                             | 12                        |
|                           | response to acidic pH                            | 4.99E-02       | 12                             | 3                         |
| <b>Metabolism</b>         | carbohydrate metabolic process                   | 1.50E-05       | 184                            | 30                        |
|                           | carbohydrate biosynthetic process                | 2.16E-04       | 59                             | 13                        |
|                           | glucan biosynthetic process                      | 4.38E-04       | 27                             | 8                         |
|                           | carbon catabolite regulation of transcription    | 4.89E-04       | 41                             | 10                        |
|                           | glutamine family amino acid biosynthetic process | 6.23E-04       | 22                             | 7                         |
|                           | nitrogen utilization                             | 9.73E-04       | 12                             | 5                         |
|                           | regulation of glycolytic process                 | 1.47E-02       | 3                              | 2                         |
|                           | tricarboxylic acid cycle                         | 3.51E-02       | 26                             | 5                         |
| <b>Biofilm</b>            | adhesion of symbiont to host                     | 4.38E-04       | 27                             | 8                         |
|                           | fungal-type cell wall organization or biogenesis | 7.39E-04       | 227                            | 30                        |
|                           | positive regulation of cell growth               | 1.12E-03       | 24                             | 7                         |
|                           | biofilm formation                                | 1.67E-03       | 81                             | 14                        |
|                           | biological adhesion                              | 1.06E-02       | 70                             | 11                        |

925

926

**Figure 1**

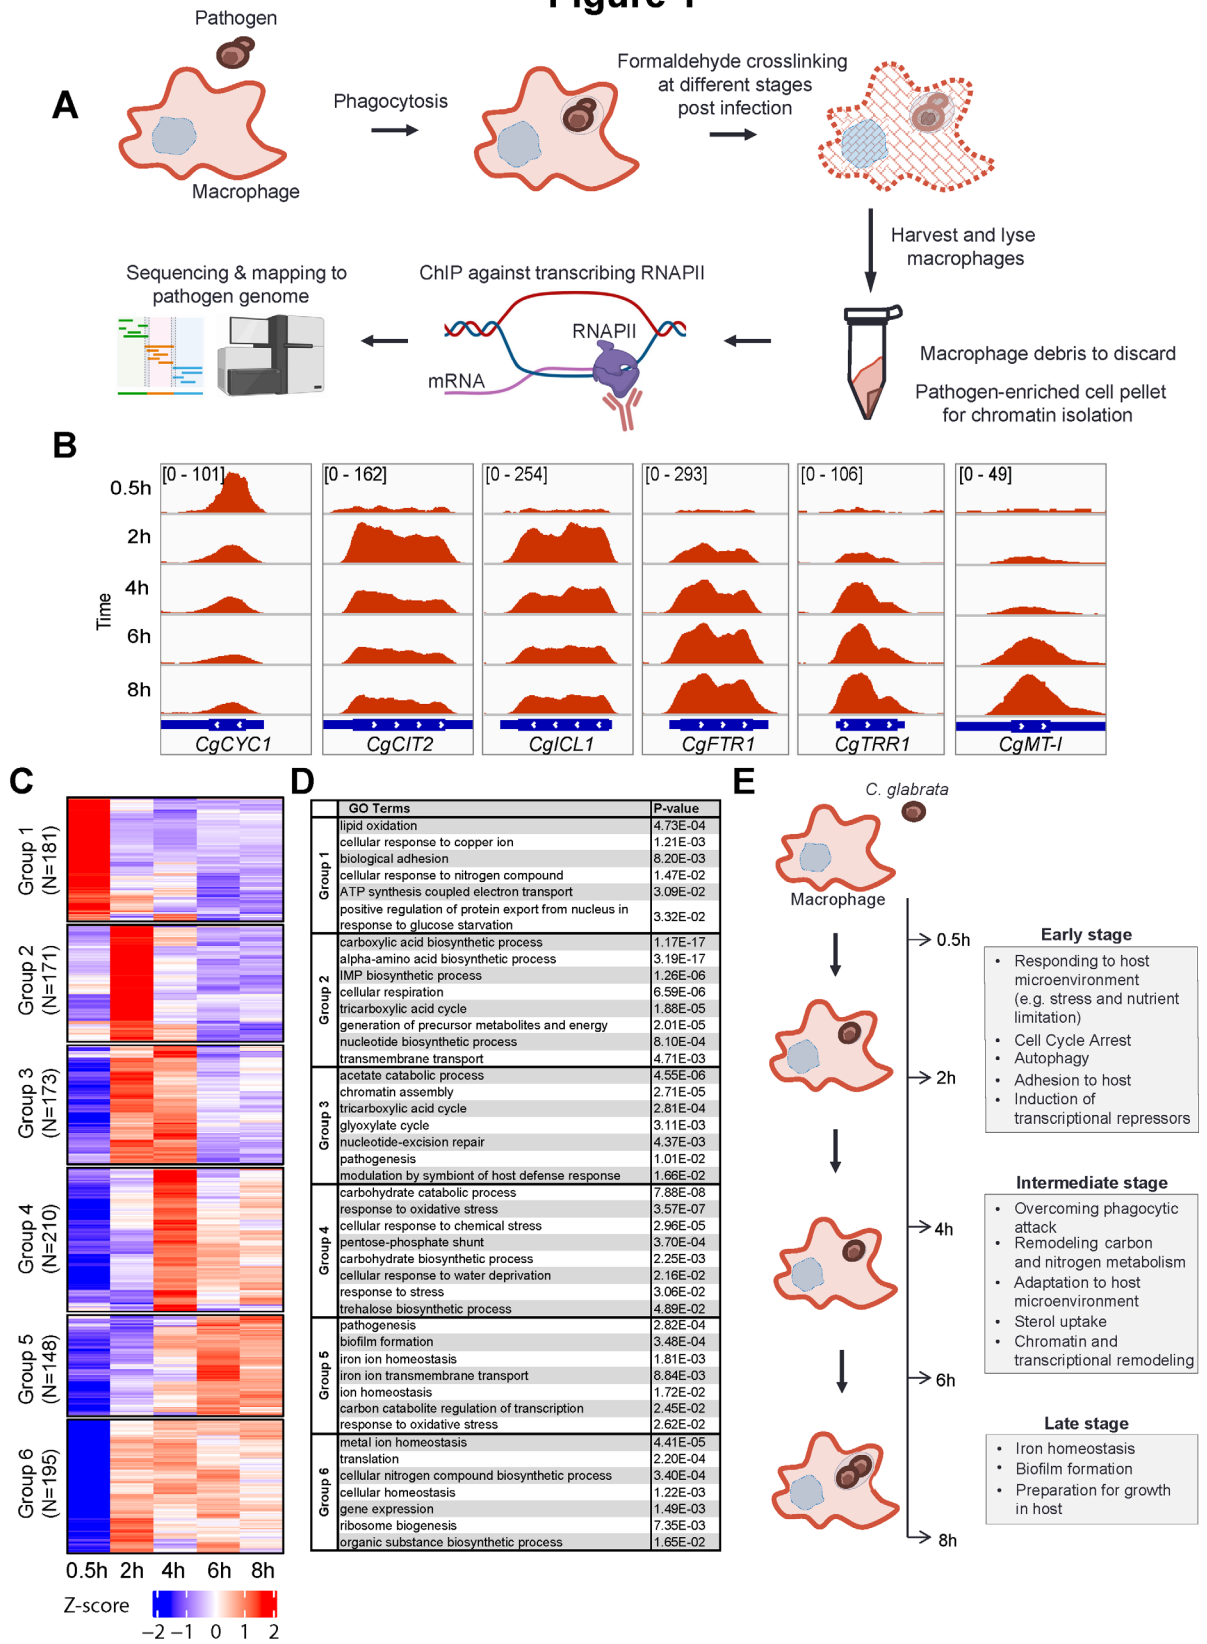

**Figure 2**

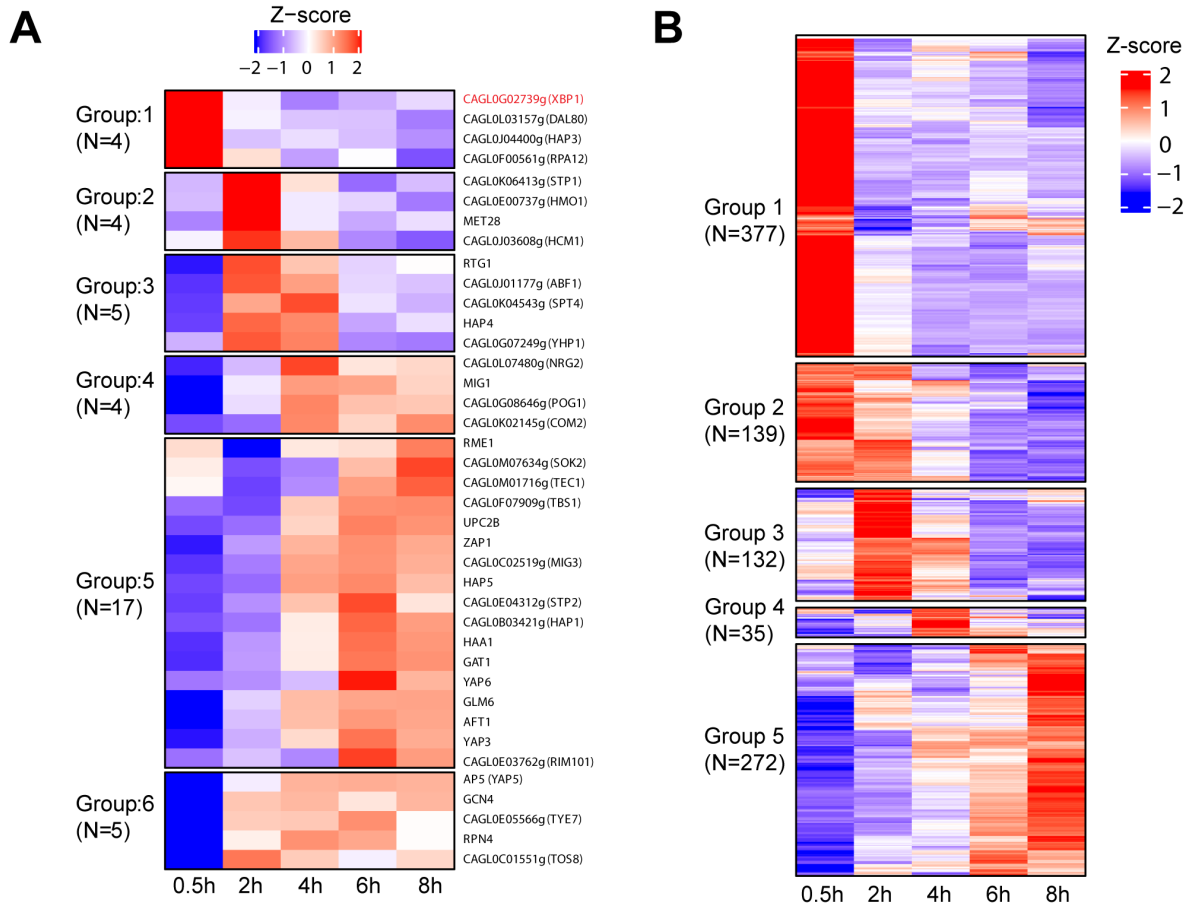

**C**

Expression kinetics in *Cgxbp1* $\Delta$  compared to WT

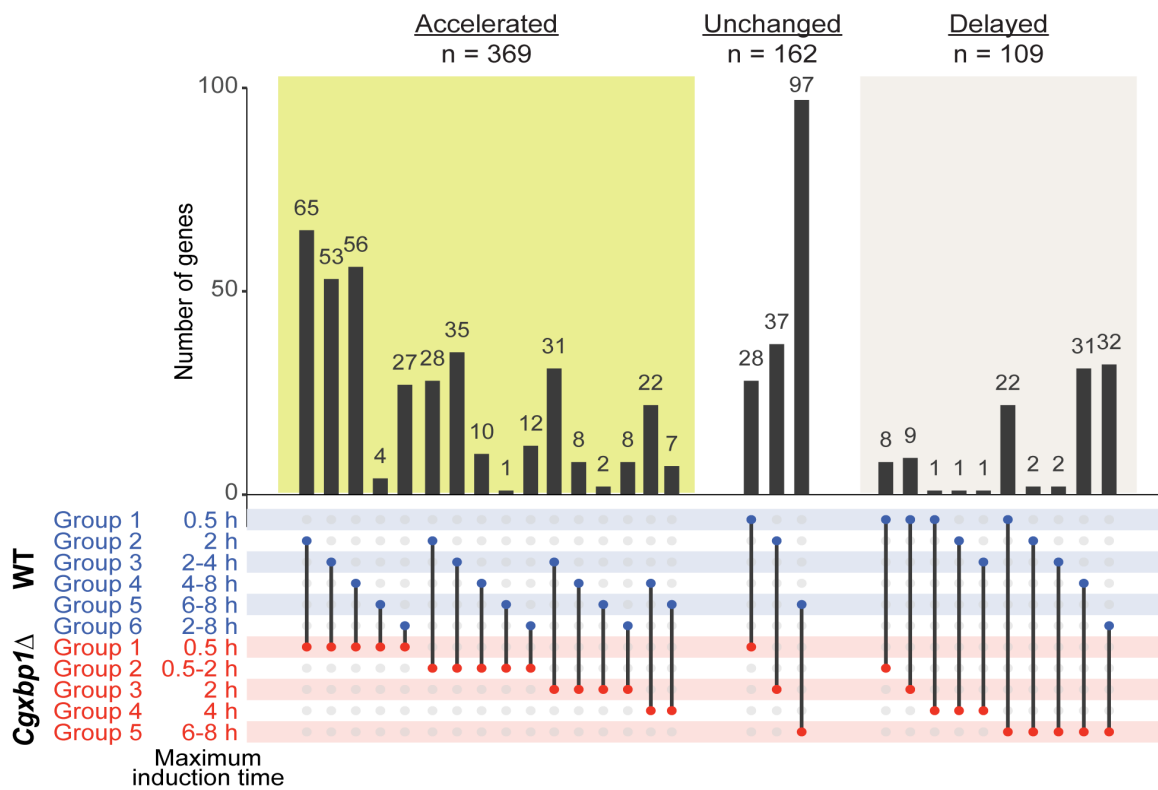

## Figure 3

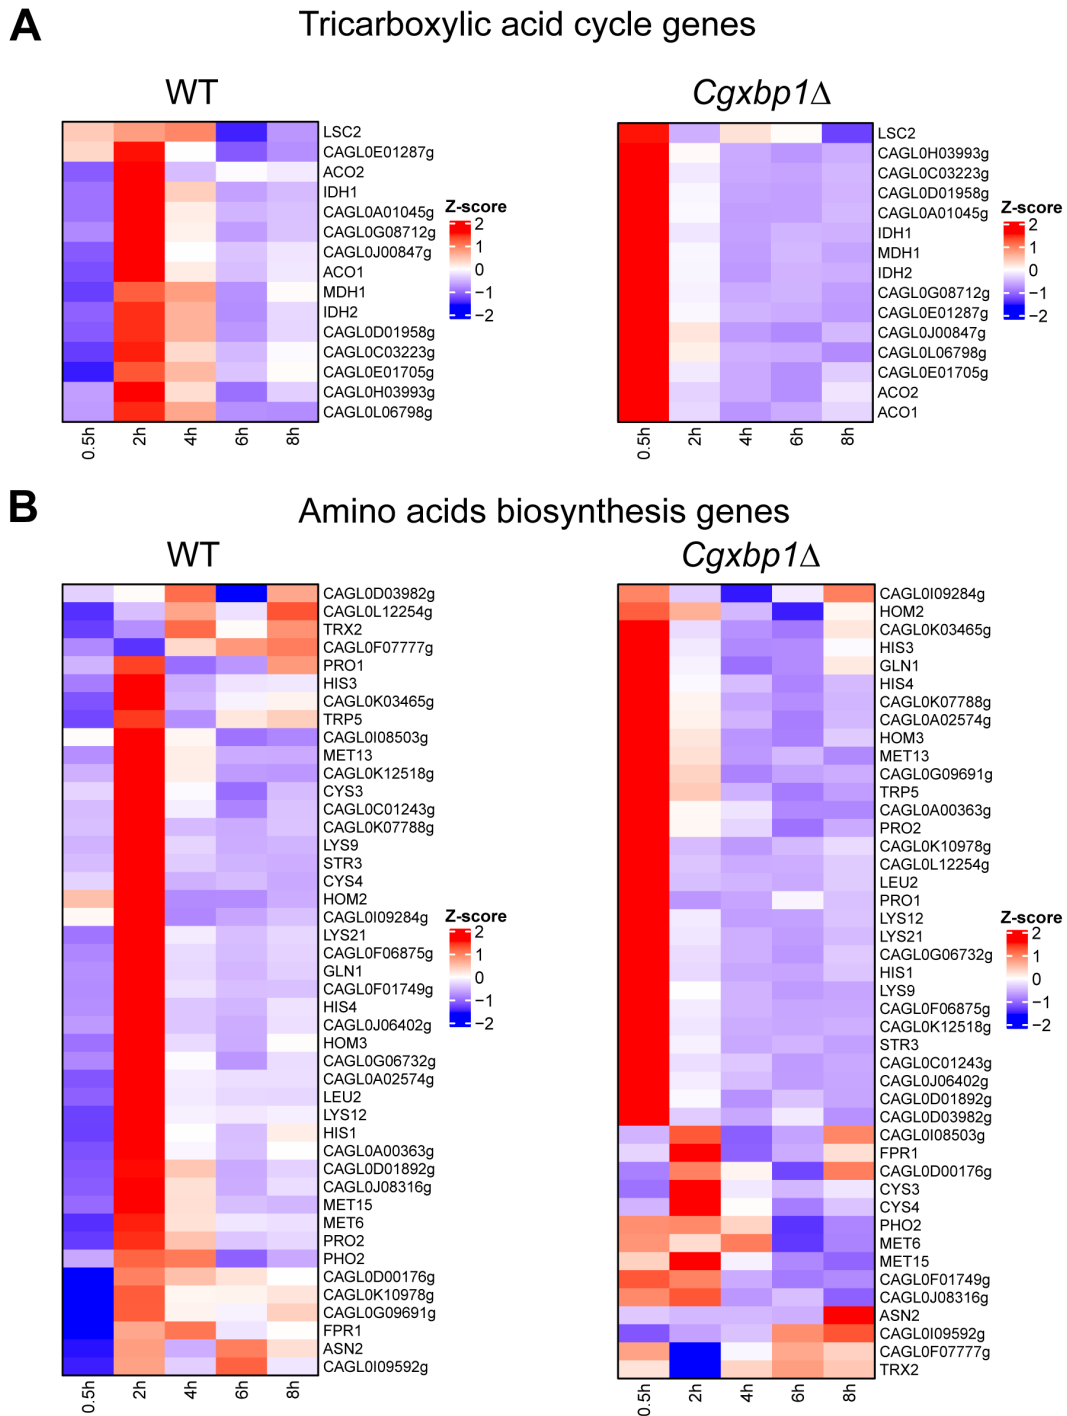

929

930

## Figure 4

**A**

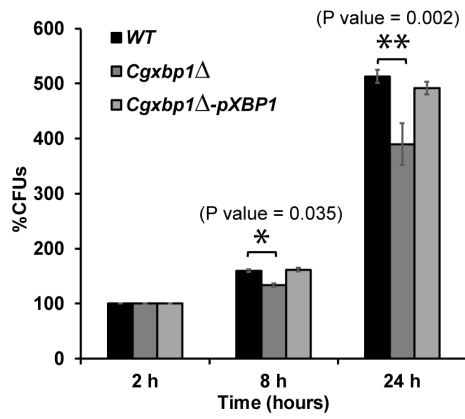

**B**

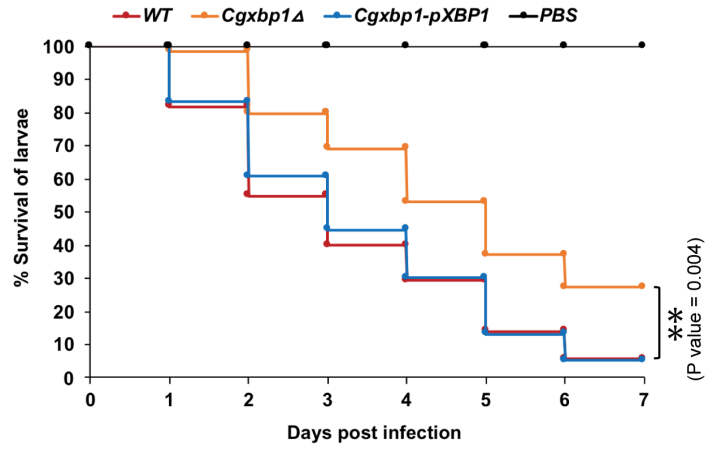

931

932

## Figure 5

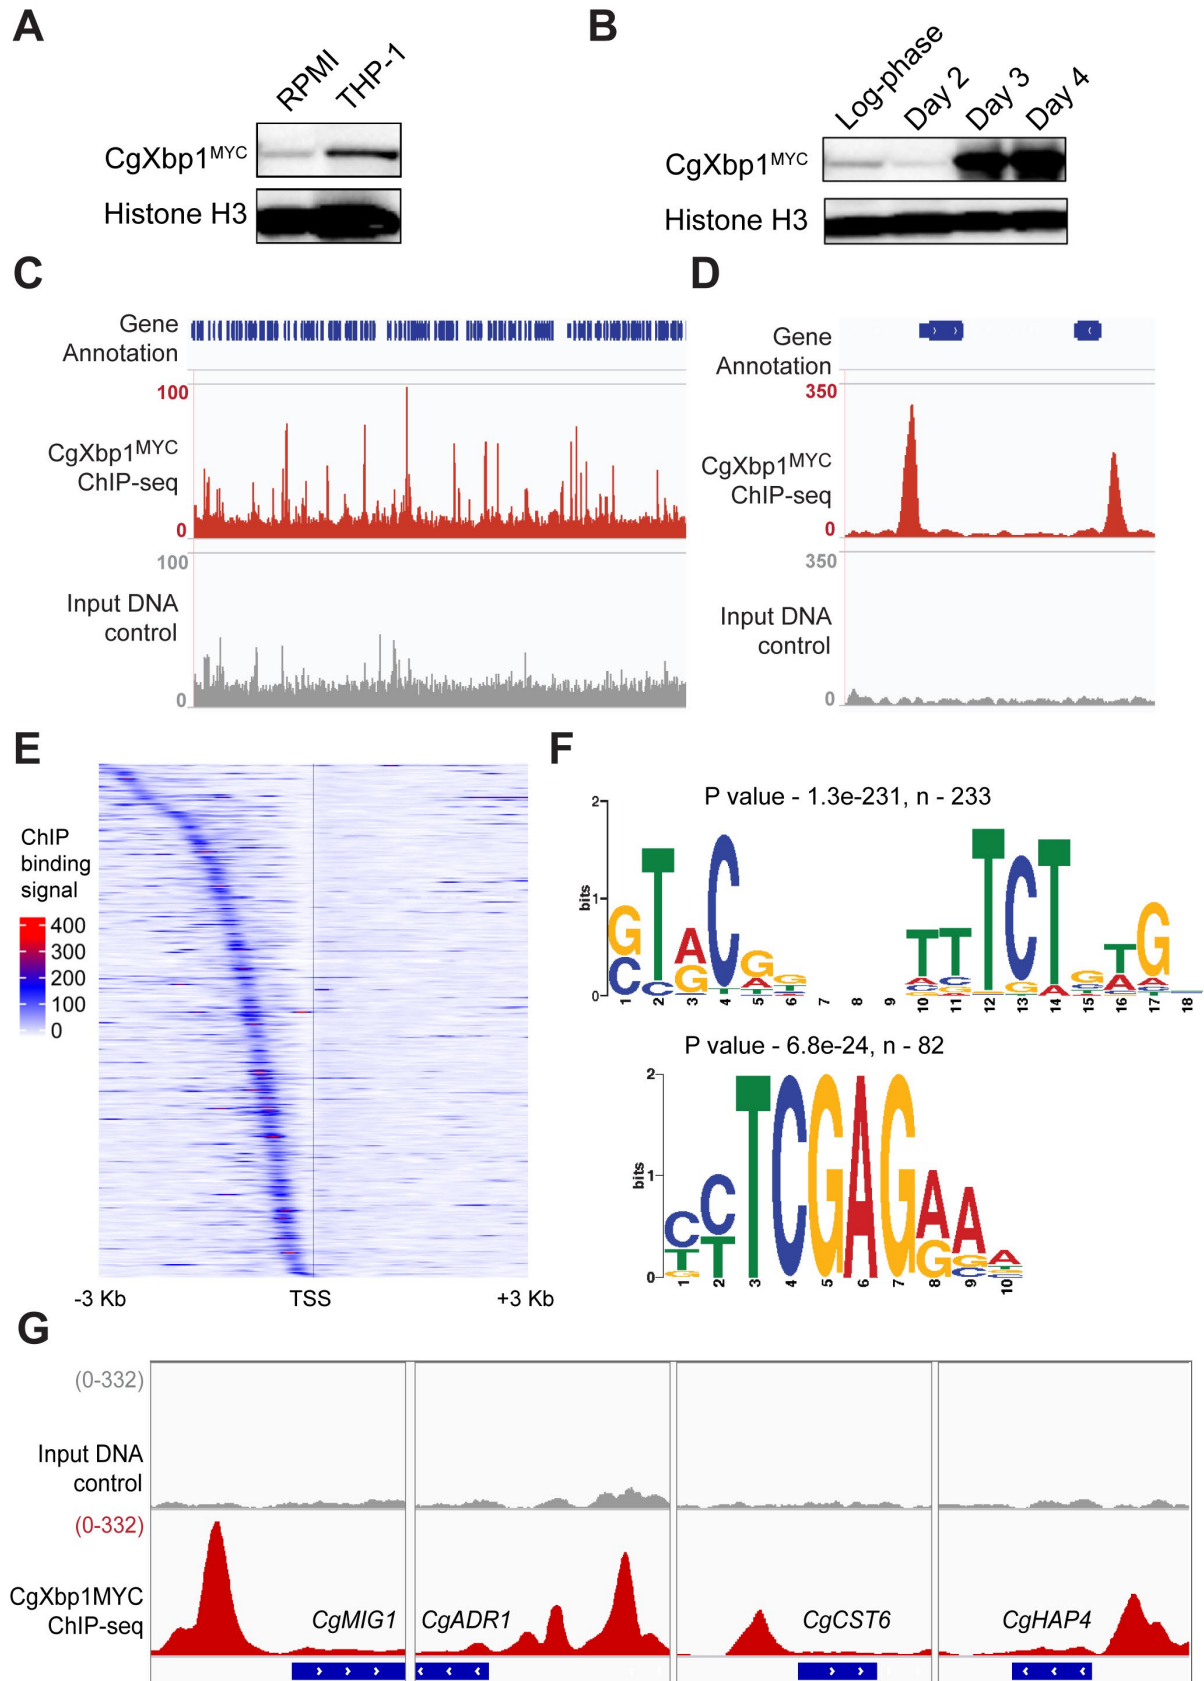

**Figure 6**

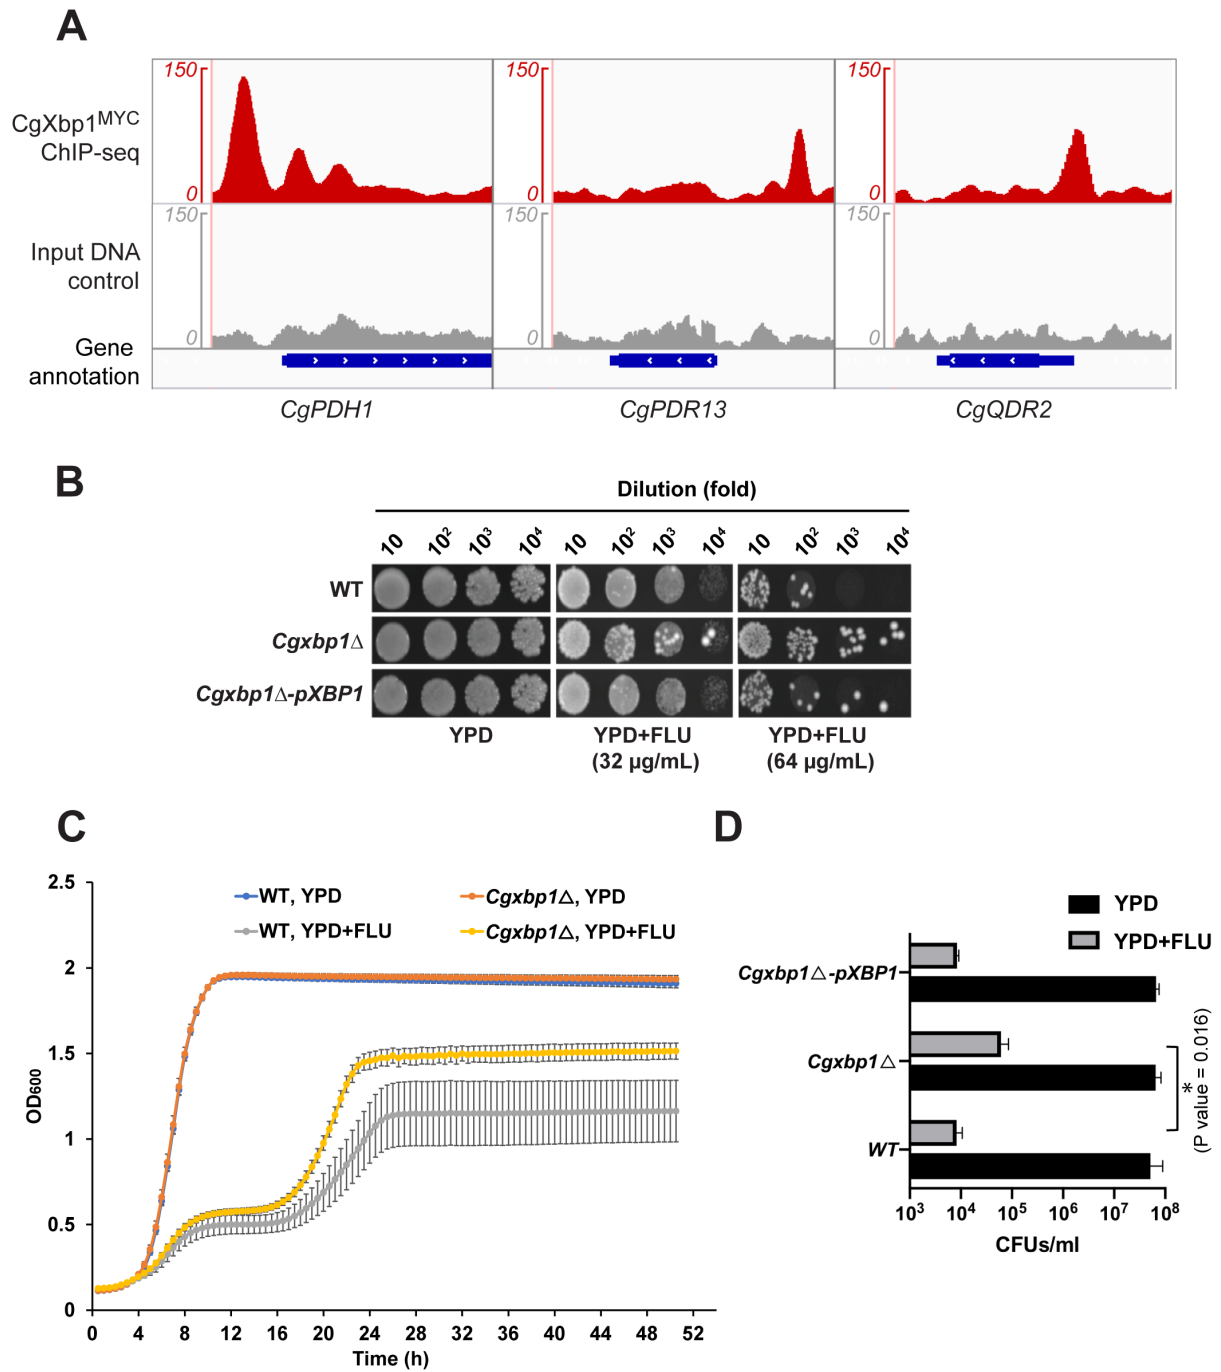

934

935



## Figure 7

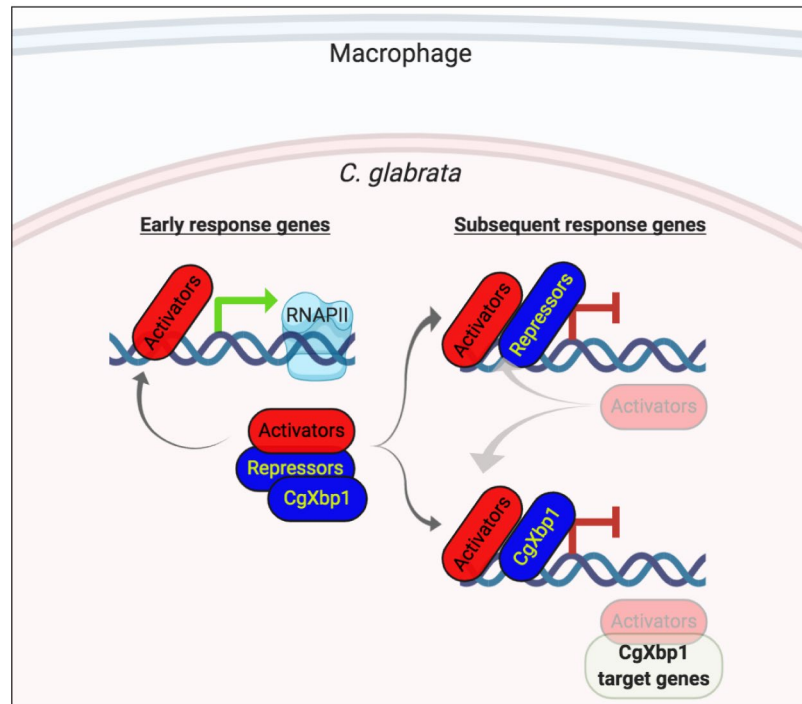

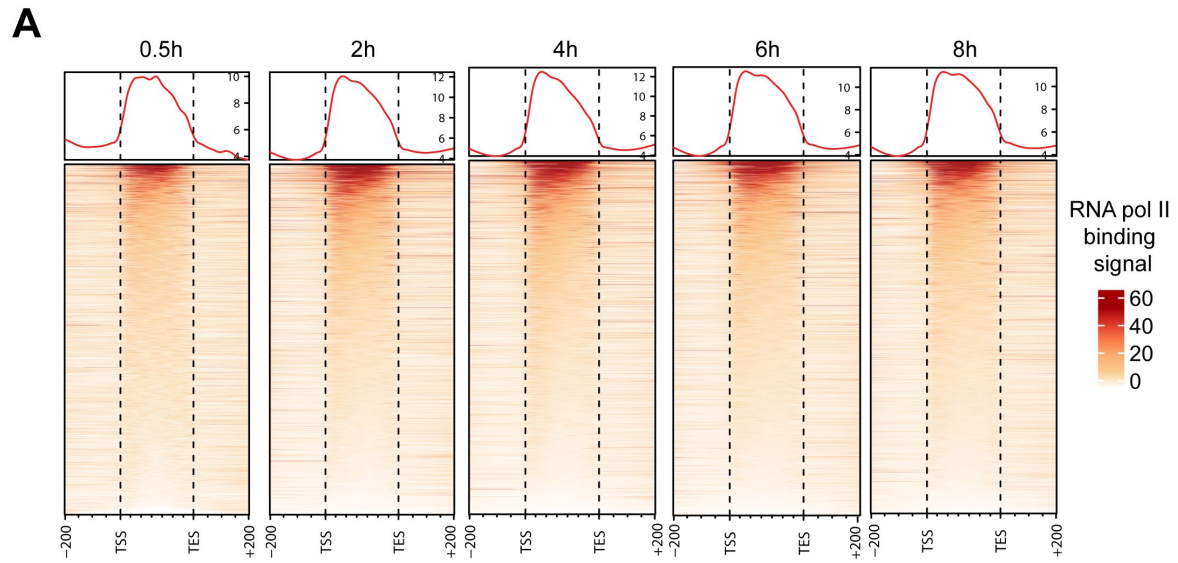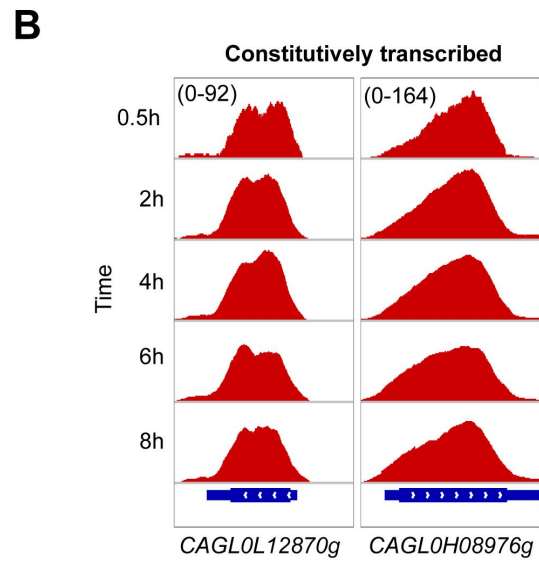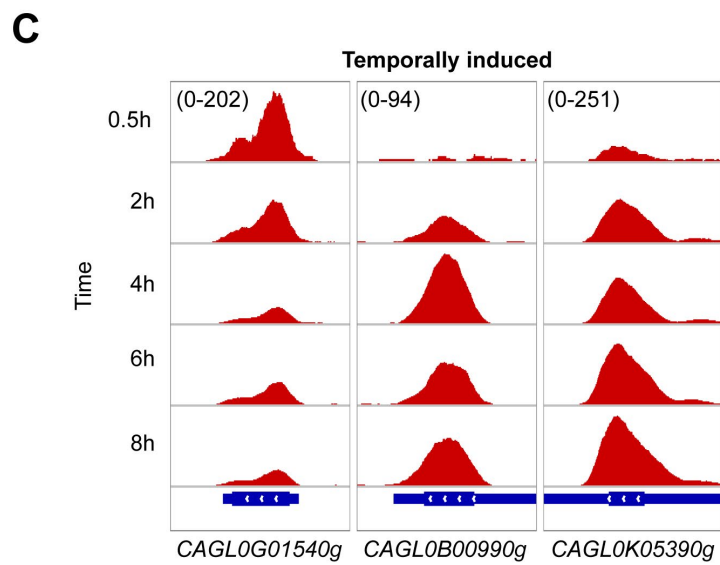

937

938 **Figure 1-figure supplement 1**

**A**

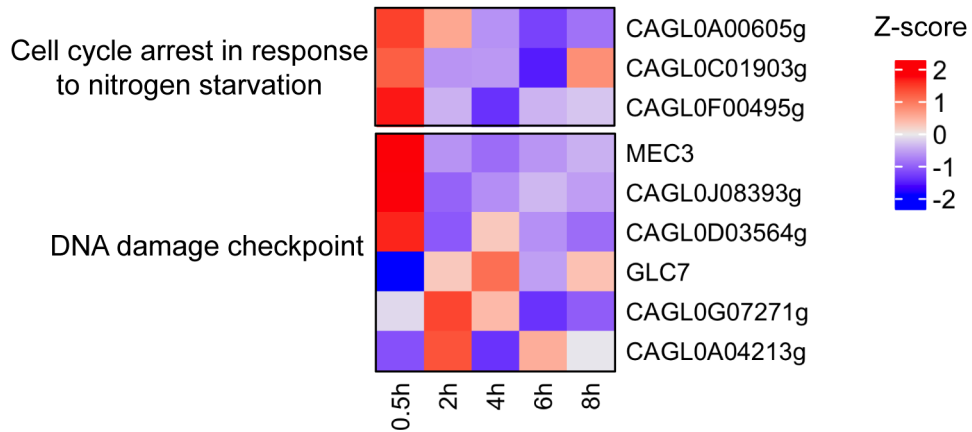

**B**

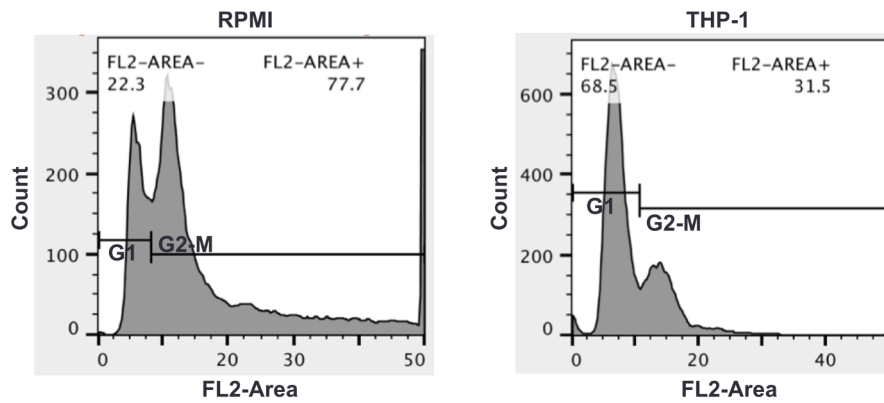

939

940 **Figure 1-figure supplement 2**

941

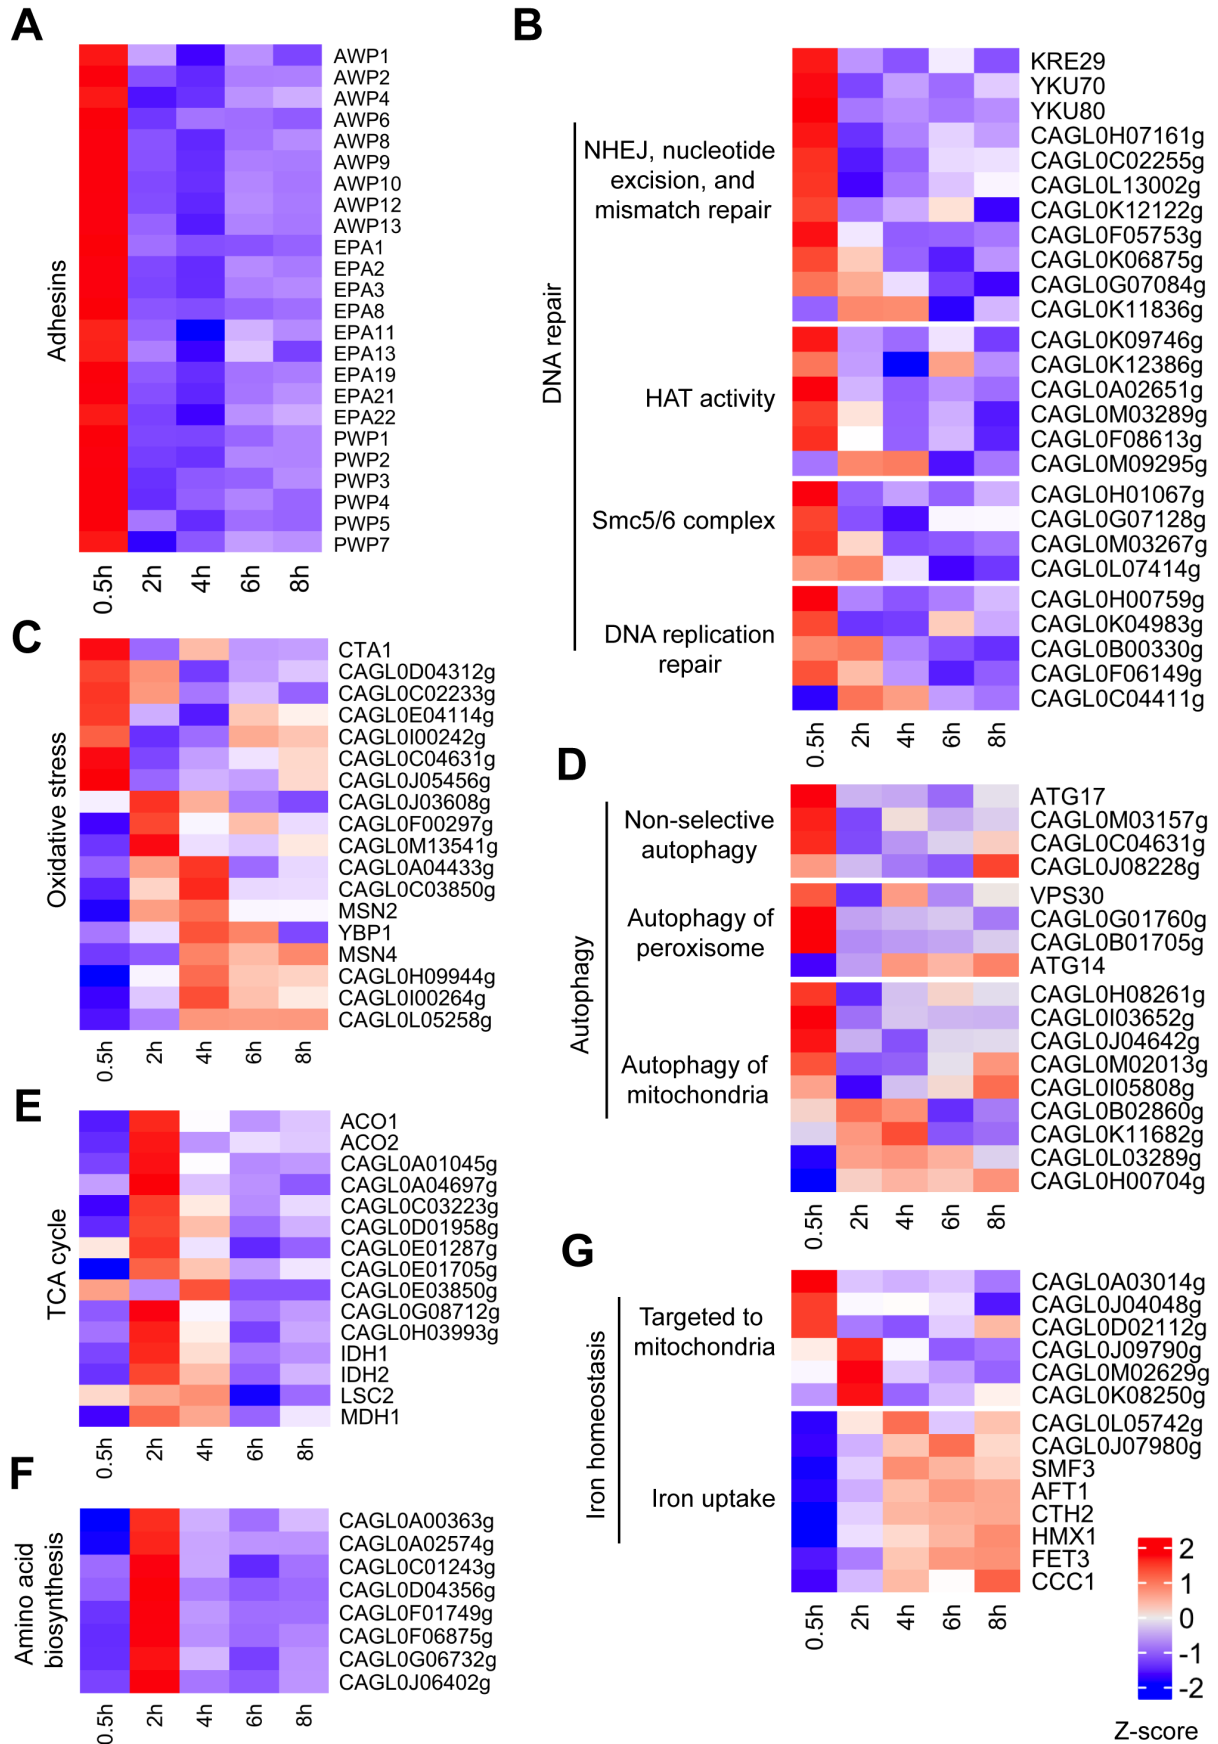

942

943 **Figure 1-figure supplement 3**

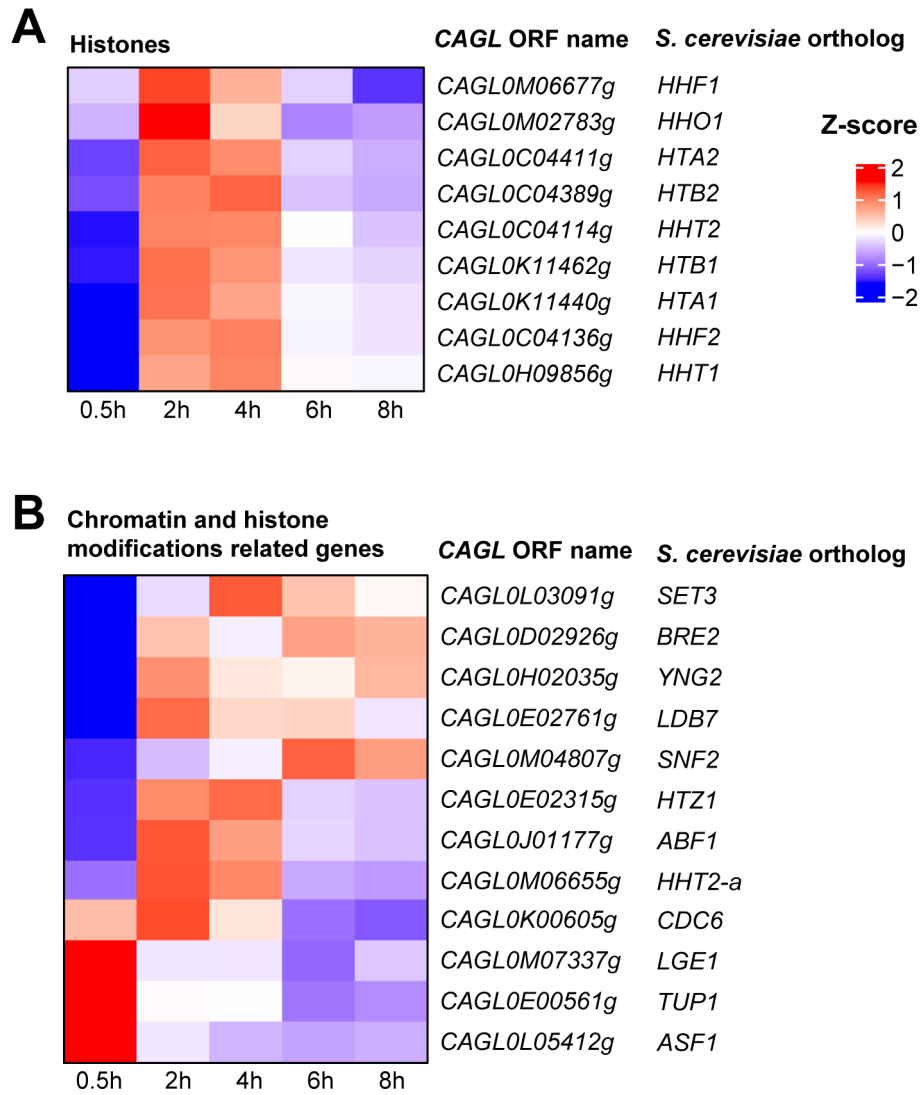

944

945 **Figure 1-figure supplement 4**

946

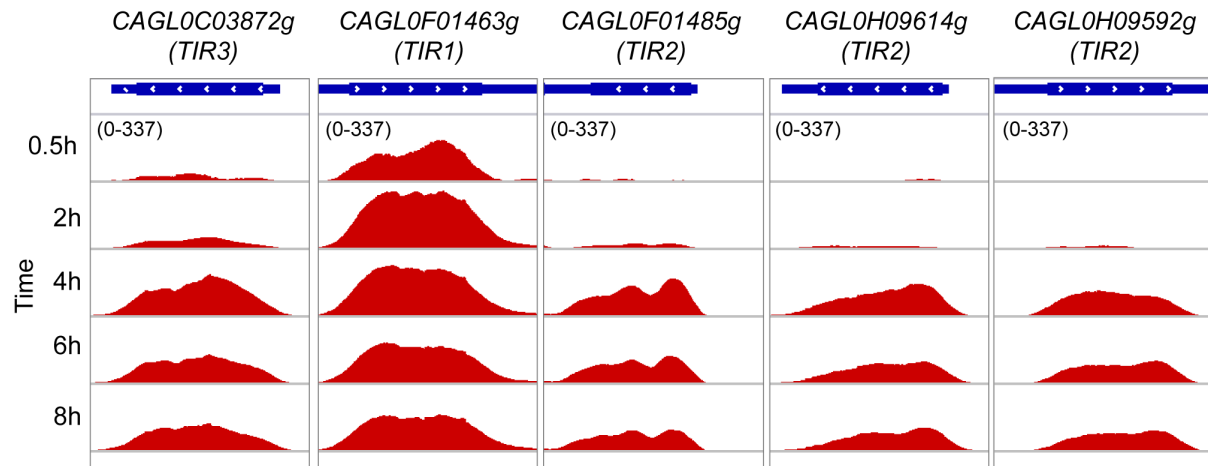

947

948 **Figure 1-figure supplement 5**

949

**A**

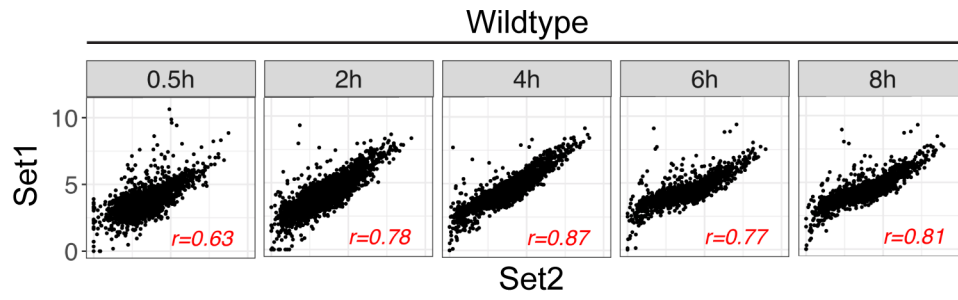

**B**

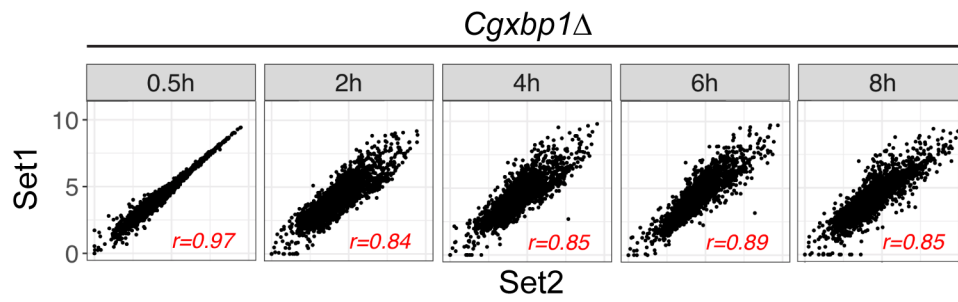

950

951 **Figure 1-figure supplement 6**

952

**A**

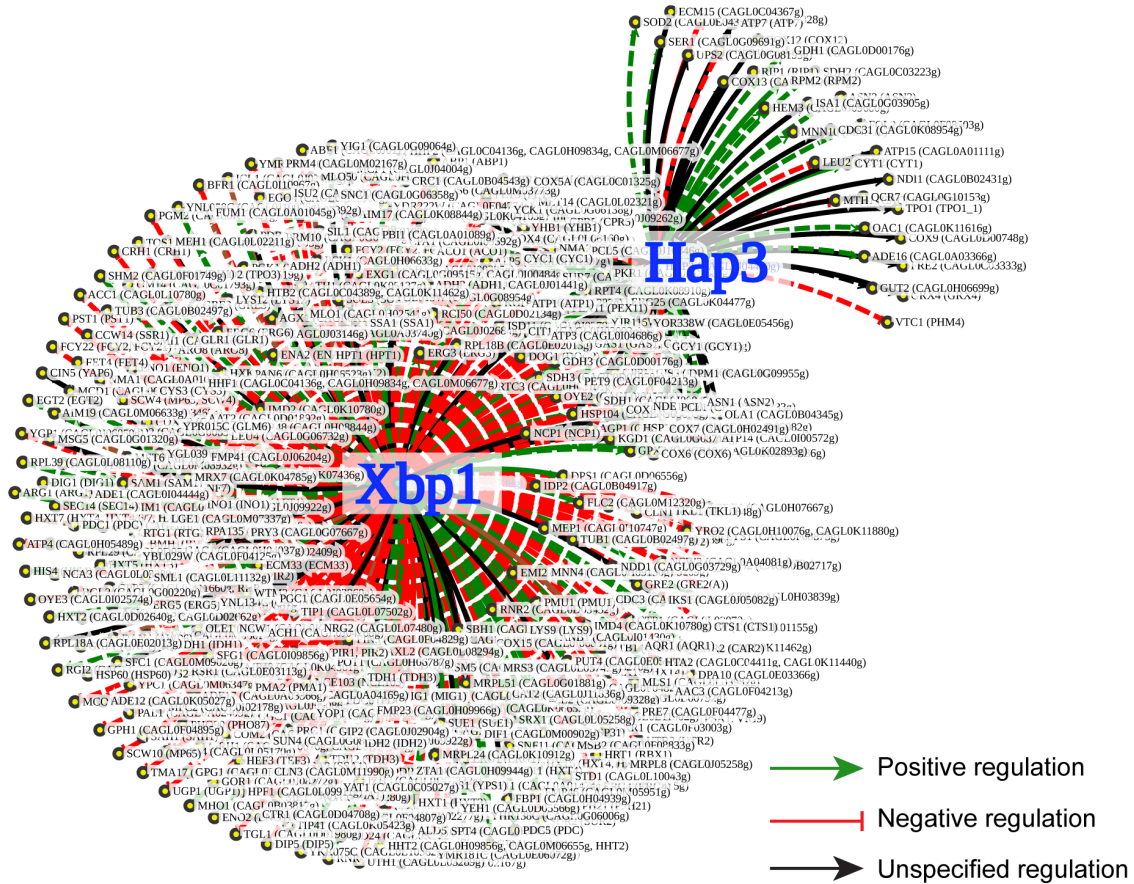

**B**

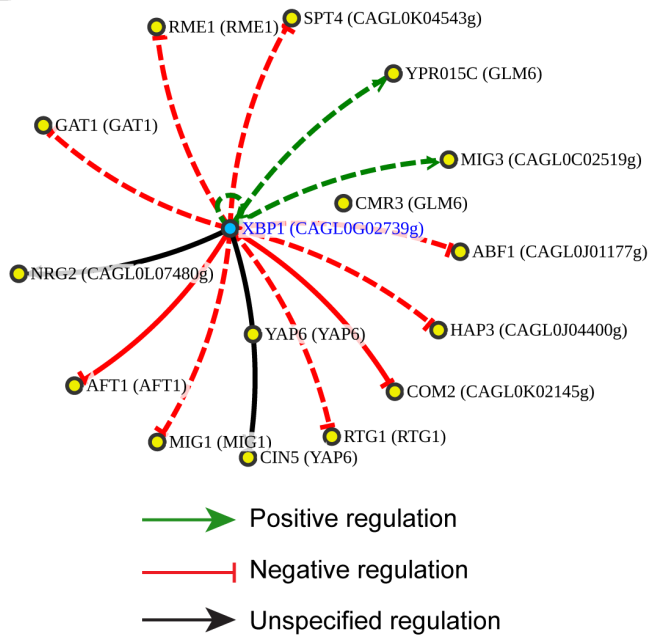

**C**

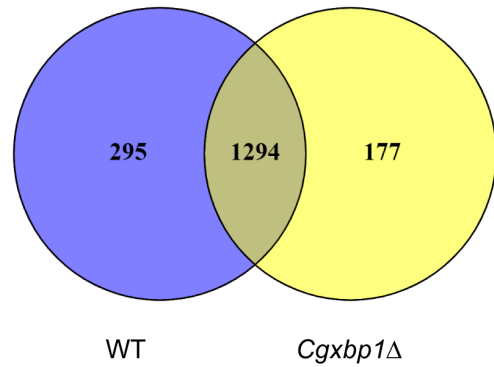

953

954 **Figure 2-figure supplement 1**

955



| GO-term                                             | WT   |    |    | <i>Cgxbp1</i> Δ |    |    |
|-----------------------------------------------------|------|----|----|-----------------|----|----|
|                                                     | 0.5h | 2h | 4h | 0.5h            | 2h | 4h |
| small molecule metabolic process                    |      | Y  | Y  | Y               | Y  |    |
| generation of precursor metabolites and energy      |      | Y  | Y  | Y               |    |    |
| ATP metabolic process                               |      | Y  | Y  | Y               |    |    |
| energy derivation by oxidation of organic compounds |      | Y  | Y  | Y               |    |    |
| aerobic respiration                                 |      | Y  | Y  | Y               |    |    |
| ribonucleotide biosynthetic process                 |      | Y  |    | Y               | Y  |    |
| purine-containing compound biosynthetic process     |      | Y  |    | Y               | Y  |    |
| ribose phosphate biosynthetic process               |      | Y  |    | Y               | Y  |    |
| purine nucleotide biosynthetic process              |      | Y  |    | Y               | Y  |    |
| oxidation-reduction process                         |      | Y  | Y  | Y               |    |    |
| ATP synthesis coupled electron transport            |      | Y  |    | Y               |    |    |
| lysine biosynthetic process                         |      | Y  |    | Y               |    |    |
| cellular amino acid biosynthetic process            |      | Y  |    | Y               |    |    |
| ion transmembrane transport                         |      | Y  |    | Y               |    |    |
| small molecule biosynthetic process                 |      | Y  |    | Y               |    |    |
| alpha-amino acid biosynthetic process               |      | Y  |    | Y               |    |    |
| carboxylic acid biosynthetic process                |      | Y  |    | Y               |    |    |
| histidine biosynthetic process                      |      | Y  |    | Y               |    |    |
| transmembrane transport                             |      | Y  |    | Y               |    |    |
| aspartate family amino acid biosynthetic process    |      | Y  |    | Y               |    |    |
| tricarboxylic acid cycle                            |      | Y  |    | Y               |    |    |
| acetate catabolic process                           |      | Y  | Y  | Y               |    |    |
| nucleoside triphosphate biosynthetic process        |      | Y  | Y  | Y               |    |    |
| carbon utilization                                  |      | Y  | Y  | Y               |    |    |
| ribonucleoside triphosphate biosynthetic process    |      | Y  | Y  | Y               |    |    |
| trehalose biosynthetic process                      |      |    | Y  | Y               |    |    |
| response to oxidative stress                        |      |    | Y  | Y               |    |    |
| response to water                                   |      |    | Y  | Y               |    |    |
| carbohydrate biosynthetic process                   |      |    | Y  | Y               |    |    |
| drug metabolic process                              |      | Y  | Y  |                 |    |    |
| 'de novo' IMP biosynthetic process                  |      | Y  |    | Y               | Y  |    |
| nucleoside phosphate biosynthetic process           |      | Y  |    | Y               | Y  |    |
| ribonucleoside monophosphate biosynthetic process   |      | Y  |    | Y               | Y  |    |
| fumarate metabolic process                          |      | Y  |    | Y               | Y  |    |
| nucleotide biosynthetic process                     |      | Y  |    | Y               | Y  |    |
| nucleosome assembly                                 |      | Y  | Y  | Y               | Y  |    |
| monocarboxylic acid metabolic process               |      | Y  | Y  |                 |    |    |

956

957 **Figure 3-figure supplement 1**

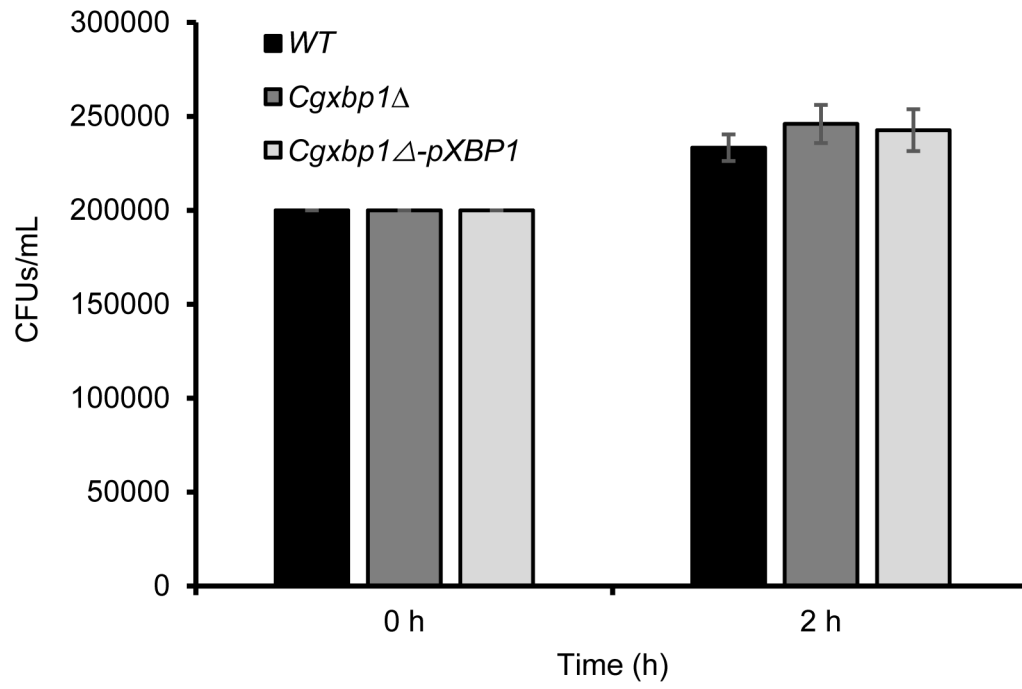

958

959 **Figure 4-figure supplement 1**

```

CAGL0G02739g  -----MRLTDSPLDDYQRLCFSQSMDLKD-----RVRHQTYKSNLAPT 38
XBP1  MKYPAFSINS DTVHLTDNPLDDYQRLYLVSVDL-RDSPPASFSAGLNIRKVNYSIA-- 57

CAGL0G02739g  MHSLSVSHLKPQLNHSSMTAADSKSDKG-----LMCFEYQFPDLVAQSQETADSNTHI 90
XBP1  -----AQFTHPNFIISARDAGNGEAAAAQNVLNCFEYQFPNL-----QTIQSLVHE 103

CAGL0G02739g  QYESGNRPYGLNAETDTPTAHRMSTEPDGLDATTLLPELQQT---SPRLTGHKRGY 146
XBP1  QTL-----LSQLASSATPHSALHLHDKNI LMGKIILPSRSNKTFVSA SP-TKQEKKAL 155

CAGL0G02739g  SSPSGPNGT-TISKNQQFRISNQSN--THKFINTNNCILWTFNFDKNEPASEENFVFTG 202
XBP1  STASRENATSSLTKNQQFKLTKMDHNLINDKLINPNNCVIWSH-----DSGYVEMTG 207

CAGL0G02739g  IWRLYQDVMKGLIQIPRKGKTS-KERQDFCRQEFDFIMSNCFCDQLKTKAQSDPV--- 258
XBP1  IWRLYQDVMKGLINLPRGDSVSTSQQQFFCKAEFEKILSFCFYNHSSSFTSEESSSVLSS 267

CAGL0G02739g  DYSRKFHRRRSTGSI SFTQKTKSNNSVTSEN SGNTHSTSNSSVNYLDFHWFDISEKVR SQ 318
XBP1  STSSPKRRTSTGS-----TFLDANASSSSTSSSTQANNYIDFWNNIKPELRDL 316

CAGL0G02739g  IFEQFKQHLEKDRNVDCSTIPKAE--EYIQRIRGGYIKIQGTWVPWYIAKLCIRFCFPI 376
XBP1  ICQSYKDFLINELGPDQIDLPLNLPANFTKRIRGGYIKIQGTWLPMEISRLLCLRFCFPI 376

CAGL0G02739g  RYLLVPIFGEQFPVECENYFFNVHMTNLKEFLENEHLINTVRRRQKSTG-----LATPPF 431
XBP1  RYFLVPIFGPDFPKDCESWYL-AH-----QNVTFASSTTGAGAATAATAAA 421

CAGL0G02739g  LTTSTFGNGSIDSPFSDEREEMEISPFHKYSNNLSPNYSPRMRKRFRSDNNLSPMSPSTK 491
XBP1  NTSTNFTSTAV-----ARPRQKPRFRPRQRSTSMSSHAKAQK 457

CAGL0G02739g  LAFRKTPPIREEPEPYEHYTSGFSTIDN-KLSTN--NTVKEETHPYRKRALSWSYTONTS 548
XBP1  LVIEDALP-----SFDSEFVENLGLSSNDKNFIKKNS----KRQKSSSTYTSQTS 501

CAGL0G02739g  QRTKLPPISSLIESINWKTNSDHVNVSEPTPTVQITLSKLASFYTRGHKYSYPSNIC--- 605
XBP1  S-----PI-----GPRDPTVQILSNLASFYNTGHRYSPGNIYIPQ 538

CAGL0G02739g  -TVSSNEHNKLASPVKNSNMETFLTARENQTGSHHYNHI-----TEPHMKHNYIRQRD 657
XBP1  QRYSLPPPNQLSSPQRQLN-----YTYDHIHPVPSQYQSP--RHYNVPSPP 582

CAGL0G02739g  MVPRVISDSLSYPLDLYKENKVDFI CLRNQTHLQENV----- 693
XBP1  IAP---APPTFPQ-PYGDHYHFLKYASEVYKQQNQRP AHNTNTNMDTSFSPRANNSLNN 638

CAGL0G02739g  ----- 693
XBP1  FKFKTNSKQ 647

```

960

961

Figure 5-figure supplement 1

**A**

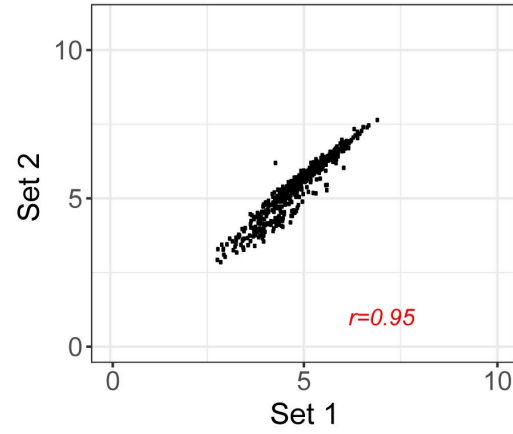

**B**

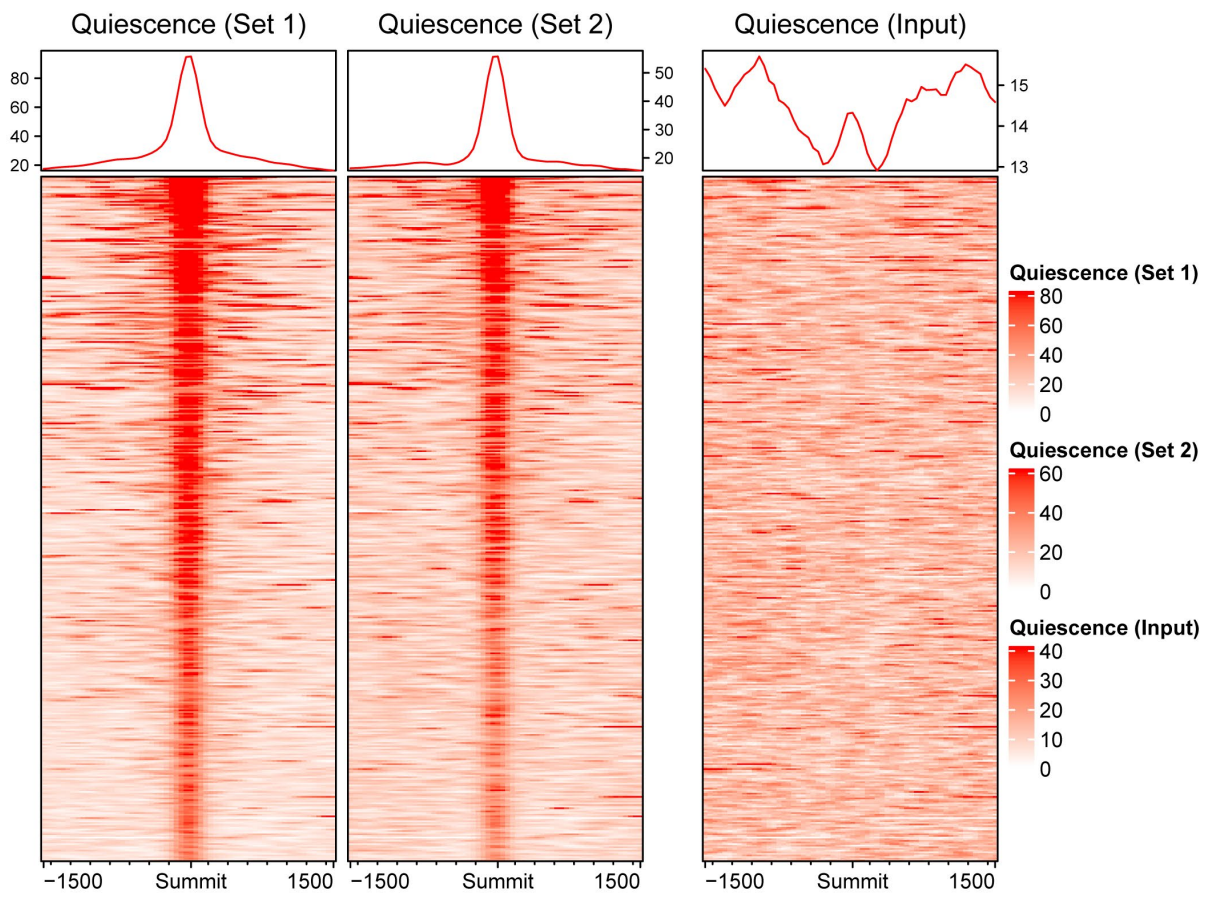

962

963 **Figure 5-figure supplement 2**

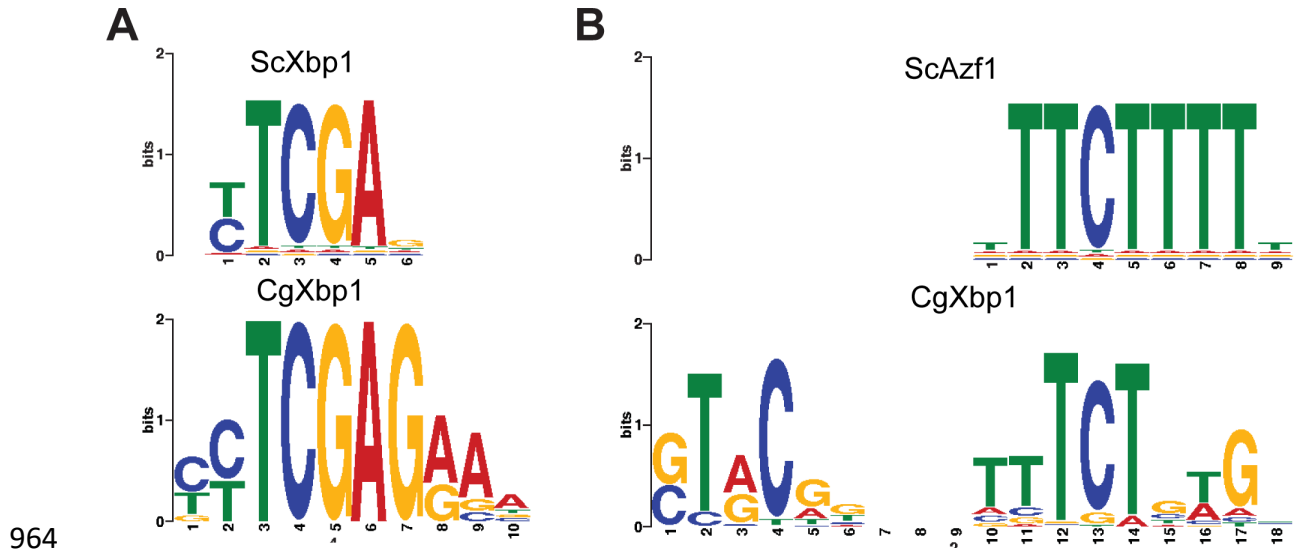

965 **Figure 5-figure supplement 3**

966 **Supplementary Files**

967 **Supplementary File 1** - List of actively transcribing genes in wildtype *C. glabrata* upon  
968 macrophage infection

969

970 **Supplementary File 2** - List of GO-terms enriched from temporally induced genes in  
971 wildtype *C. glabrata* in response to macrophage infection

972

973 **Supplementary File 3** – Gene regulatory associations between indicated TFs and the  
974 macrophage infection-induced genes reported in the PathoYeast database

975

976 **Supplementary File 4** – List of orthologues for the macrophage infection-induced TF and  
977 non-TF genes of *C. glabrata* previously shown to have a regulatory association with Xbp1 or  
978 Hap3 in *S. cerevisiae* obtained from the PathoYeast database

979

980 **Supplementary File 5** – List of actively transcribing genes in *Cgxbp1Δ* mutant upon  
981 macrophage infection

982

983 **Supplementary File 6** - List of GO-terms enriched from temporally induced genes in  
984 *Cgxbp1Δ* in response to macrophage infection

985

986 **Supplementary File 7** - MACS2 output metadata displaying the coordinates of CgXbp1  
987 binding sites during quiescence phase

988

989 **Supplementary File 8** - List of CgXbp1 target genes displaying CgXbp1 binding during  
990 quiescence phase

991

992 **Supplementary File 9** - List of CgXbp1 target genes with two consensus DNA binding  
993 motifs

994

995 **Supplementary File 10** - List of GO-terms for biological processes enriched from CgXbp1  
996 targets in quiescence phase

997

998 **Supplementary File 11** – List of TF-encoding genes with CgXbp1 binding at their promoters

999

1000 **Additional files**

1001

1002 **Figure 5-Source data** – Western blot original image files used in Figures 5A & B
